# Supplementary material
Source: MDPI journal article supplement (https://www.mdpi.com/2075-163X/13/4/562)
Supplement: s1 [file s1]

**Table 4.** Whole rock Nd-Pb isotopic compositions of meta-volcanic rocks from the Xileng Formation

| Sample               | Sm<br>(ppm) | Nd<br>(ppm) | $^{147}\text{Sm}/^{144}\text{Nd}$ | $^{143}\text{Nd}/^{144}\text{Nd}$ | $2\sigma$ | $\epsilon_{\text{Nd}}(t)$ | $T_{\text{DM1}}$ | $T_{\text{DM2}}$ | $^{206}\text{Pb}/^{204}\text{Pb}$ | $2\sigma$ | $^{207}\text{Pb}/^{204}\text{Pb}$ | $2\sigma$ | $^{208}\text{Pb}/^{204}\text{Pb}$ | $2\sigma$ |
|----------------------|-------------|-------------|-----------------------------------|-----------------------------------|-----------|---------------------------|------------------|------------------|-----------------------------------|-----------|-----------------------------------|-----------|-----------------------------------|-----------|
| Chuzhou, early-stage |             |             |                                   |                                   |           |                           |                  |                  |                                   |           |                                   |           |                                   |           |
| XL02                 | 3.03        | 18.17       | 0.1007                            | 0.511577                          | 0.000008  | -11.03                    | 2.11             | 2.35             | 16.3282                           | 0.0010    | 15.3157                           | 0.0009    | 36.9317                           | 0.0022    |
| Chuzhou, late-stage  |             |             |                                   |                                   |           |                           |                  |                  |                                   |           |                                   |           |                                   |           |
| XL06                 | 6.21        | 30.46       | 0.1232                            | 0.512111                          | 0.000007  | -3.34                     | 1.75             | 1.69             | 17.2062                           | 0.0012    | 15.4652                           | 0.0011    | 37.8386                           | 0.0026    |
| XL13                 | 2.18        | 12.97       | 0.1014                            | 0.512015                          | 0.000008  | -2.54                     | 1.54             | 1.67             | 17.7386                           | 0.0009    | 15.5096                           | 0.0008    | 38.5032                           | 0.0019    |
| Feidong, late-stage  |             |             |                                   |                                   |           |                           |                  |                  |                                   |           |                                   |           |                                   |           |
| XL15                 | 4.50        | 23.04       | 0.1182                            | 0.512169                          | 0.000009  | -1.73                     | 1.56             | 1.56             | 17.1014                           | 0.0014    | 15.4797                           | 0.0012    | 37.9261                           | 0.0030    |
| XL17                 | 5.03        | 22.39       | 0.1357                            | 0.512333                          | 0.000008  | -0.19                     | 1.59             | 1.44             | 16.7106                           | 0.0012    | 15.4306                           | 0.0011    | 37.4871                           | 0.0026    |
| Lujiang, late-stage  |             |             |                                   |                                   |           |                           |                  |                  |                                   |           |                                   |           |                                   |           |
| XL18                 | 4.29        | 24.20       | 0.1071                            | 0.512109                          | 0.000010  | -1.86                     | 1.49             | 1.57             | 17.4926                           | 0.0010    | 15.4925                           | 0.0009    | 38.3408                           | 0.0023    |
| XL19                 | 5.28        | 29.78       | 0.1072                            | 0.512068                          | 0.000008  | -2.67                     | 1.55             | 1.64             | 17.4206                           | 0.0012    | 15.4894                           | 0.0011    | 38.0282                           | 0.0026    |
| XL20                 | 5.90        | 32.26       | 0.1105                            | 0.511735                          | 0.000009  | -9.48                     | 2.08             | 2.19             | 17.1222                           | 0.0012    | 15.4895                           | 0.0011    | 38.2379                           | 0.0026    |
| Susong, late-stage   |             |             |                                   |                                   |           |                           |                  |                  |                                   |           |                                   |           |                                   |           |
| XL21                 | 6.50        | 31.22       | 0.1258                            | 0.512264                          | 0.000006  | -0.60                     | 1.53             | 1.47             | 17.3781                           | 0.0016    | 15.4900                           | 0.0014    | 37.8293                           | 0.0033    |
| XL22                 | 4.79        | 23.40       | 0.1237                            | 0.512047                          | 0.000006  | -4.63                     | 1.86             | 1.80             | 17.1365                           | 0.0010    | 15.4712                           | 0.0009    | 37.6849                           | 0.0022    |
| XL23                 | 8.84        | 43.00       | 0.1242                            | 0.512312                          | 0.000011  | 0.49                      | 1.43             | 1.38             | 17.4093                           | 0.0007    | 15.4792                           | 0.0006    | 37.8031                           | 0.0015    |
| XL24                 | 4.28        | 23.50       | 0.1101                            | 0.512007                          | 0.000009  | -4.13                     | 1.68             | 1.76             | 17.5725                           | 0.0011    | 15.4930                           | 0.0009    | 38.2456                           | 0.0022    |
| XL25                 | 5.98        | 27.78       | 0.1301                            | 0.512306                          | 0.000013  | -0.18                     | 1.54             | 1.44             | 17.7428                           | 0.0014    | 15.5231                           | 0.0012    | 38.1055                           | 0.0030    |

Nd initial ratio of early-stage volcanic rock is calculated back to 790 Ma, Nd initial ratios of late-stage volcanic rocks are calculated back to 740 Ma.

Two-stage model ages ( $T_{\text{DM2}}$ ) are calculated using present-day ( $^{147}\text{Sm}/^{144}\text{Nd}$ )<sub>DM</sub> of 0.2137, ( $^{143}\text{Nd}/^{144}\text{Nd}$ )<sub>DM</sub> of 0.51315, and ( $^{147}\text{Sm}/^{144}\text{Nd}$ )<sub>C</sub> of 0.118.
