# Supplementary material
Source: MDPI journal article supplement (https://www.mdpi.com/2075-163X/13/4/562)
Supplement: s1 [file s1]

**Table S3.** Contents of major (wt.%) and trace (ppm) elements for meta-volcanic rocks from the Xileng Formation

| Sample                                      | XL02                 | XL05  | XL03                | XL06  | XL13   | XL14  | XL15                | XL16  | XL17  | XL18                | XL19  | XL20   | XL21               | XL22  | XL23  | XL24  | XL25  |
|---------------------------------------------|----------------------|-------|---------------------|-------|--------|-------|---------------------|-------|-------|---------------------|-------|--------|--------------------|-------|-------|-------|-------|
| Location                                    | Chuzhou, early-stage |       | Chuzhou, late-stage |       |        |       | Feidong, late-stage |       |       | Lujiang, late-stage |       |        | Susong, late-stage |       |       |       |       |
| SiO <sub>2</sub>                            | 66.78                | 68.95 | 74.68               | 75.23 | 74.65  | 71.39 | 77.67               | 78.50 | 72.40 | 67.41               | 74.16 | 74.23  | 67.32              | 74.67 | 76.57 | 73.42 | 70.91 |
| TiO <sub>2</sub>                            | 0.24                 | 0.33  | 0.27                | 0.18  | 0.21   | 0.38  | 0.28                | 0.21  | 0.31  | 0.30                | 0.25  | 0.40   | 0.63               | 0.40  | 0.31  | 0.35  | 0.42  |
| Al <sub>2</sub> O <sub>3</sub>              | 15.90                | 15.37 | 13.90               | 13.02 | 14.00  | 14.89 | 12.70               | 12.64 | 15.04 | 19.02               | 14.49 | 13.81  | 15.80              | 13.36 | 12.86 | 13.88 | 15.54 |
| Fe <sub>2</sub> O <sub>3</sub> <sup>T</sup> | 2.24                 | 2.38  | 1.55                | 2.42  | 1.13   | 1.96  | 1.33                | 1.40  | 2.52  | 2.47                | 1.90  | 2.93   | 3.23               | 2.42  | 1.68  | 2.11  | 3.46  |
| MnO                                         | 0.05                 | 0.02  | 0.03                | 0.03  | 0.03   | 0.13  | 0.02                | 0.02  | 0.04  | 0.11                | 0.06  | 0.07   | 0.13               | 0.09  | 0.05  | 0.06  | 0.02  |
| MgO                                         | 0.69                 | 0.90  | 0.26                | 0.03  | 0.49   | 0.76  | 0.41                | 0.39  | 0.44  | 0.47                | 0.37  | 0.93   | 0.73               | 0.42  | 0.32  | 0.65  | 0.62  |
| CaO                                         | 2.43                 | 1.61  | 0.41                | 0.04  | 0.04   | 0.84  | 0.08                | 0.03  | 0.04  | 0.01                | 1.30  | 0.14   | 2.18               | 0.37  | 0.06  | 1.18  | 0.07  |
| K <sub>2</sub> O                            | 3.74                 | 3.92  | 1.38                | 1.71  | 5.70   | 3.18  | 2.73                | 2.76  | 2.87  | 6.35                | 1.55  | 3.62   | 2.27               | 1.28  | 1.04  | 2.32  | 2.99  |
| Na <sub>2</sub> O                           | 4.43                 | 4.04  | 6.17                | 6.16  | 2.65   | 4.23  | 3.60                | 2.09  | 4.68  | 0.54                | 4.20  | 3.02   | 5.37               | 5.08  | 5.25  | 4.41  | 3.40  |
| P <sub>2</sub> O <sub>5</sub>               | 0.11                 | 0.11  | 0.02                | 0.02  | 0.01   | 0.01  | 0.04                | 0.01  | 0.01  | 0.02                | 0.01  | 0.08   | 0.14               | 0.02  | 0.01  | 0.08  | 0.02  |
| BaO                                         | 0.22                 | 0.18  | 0.05                | 0.06  | 0.15   | 0.09  | 0.09                | 0.12  | 0.10  | 0.12                | 0.10  | 0.11   | 0.09               | 0.04  | 0.03  | 0.06  | 0.06  |
| LOI                                         | 2.70                 | 1.74  | 0.95                | 0.21  | 1.03   | 1.38  | 1.01                | 1.32  | 1.47  | 2.59                | 1.55  | 1.64   | 1.28               | 1.30  | 0.92  | 1.12  | 2.21  |
| Total                                       | 99.58                | 99.62 | 99.68               | 99.11 | 100.09 | 99.25 | 99.96               | 99.49 | 99.92 | 99.41               | 99.97 | 100.99 | 99.22              | 99.46 | 99.1  | 99.66 | 99.72 |
| Li                                          | 17.6                 | 13.7  | 5.10                | 1.40  | 14.9   | 31.8  | 6.10                | 3.70  | 7.50  | 9.80                | 7.50  | 17.0   | 18.3               | 19.4  | 5.7   | 23.3  | 14.9  |
| Be                                          | 1.66                 | 2.42  | 1.93                | 1.38  | 2.08   | 2.03  | 1.90                | 1.55  | 2.45  | 3.54                | 2.18  | 2.25   | 1.76               | 1.46  | 1.77  | 1.61  | 2.49  |
| Sc                                          | 2.97                 | 4.17  | 7.02                | 7.00  | 2.57   | 3.61  | 5.35                | 3.23  | 8.45  | 4.20                | 4.42  | 7.09   | 11.89              | 8.31  | 5.76  | 6.14  | 10.1  |
| V                                           | 24.7                 | 35.2  | 3.90                | 6.00  | 8.40   | 12.7  | 23.0                | 14.9  | 15.2  | 19.2                | 10.1  | 45.1   | 36.8               | 16.9  | 12.7  | 21.4  | 32.1  |
| Cr                                          | 11.5                 | 50.9  | 2.10                | 2.90  | 2.30   | 3.70  | 12.6                | 4.00  | 3.00  | 7.50                | 8.90  | 41.9   | 6.00               | 6.10  | 2.30  | 3.30  | 9.30  |
| Ni                                          | 5.33                 | 20.2  | 1.68                | 2.40  | 1.54   | 1.46  | 7.06                | 2.26  | 1.73  | 4.62                | 4.56  | 19.6   | 3.39               | 3.53  | 1.45  | 2.99  | 4.7   |
| Cu                                          | 6.14                 | 16.1  | 1.85                | 1.74  | 1.34   | 3.36  | 1.84                | 1.31  | 5.28  | 1.92                | 3.65  | 8.73   | 6.10               | 4.18  | 1.73  | 3.80  | 14.6  |
| Zn                                          | 27.3                 | 29.6  | 20.4                | 20.1  | 33.1   | 66.3  | 32.2                | 28.3  | 74.9  | 61.9                | 64.6  | 57.5   | 102                | 61.6  | 59.2  | 50.6  | 76.4  |
| Ga                                          | 19.5                 | 19.8  | 15.5                | 15.9  | 16.5   | 15.9  | 15.8                | 13.2  | 22.3  | 22.9                | 16.4  | 19.4   | 22.2               | 14.8  | 15.4  | 15.1  | 16.5  |
| Rb                                          | 54.4                 | 60.5  | 22.7                | 28.2  | 125    | 46.2  | 82.4                | 70.6  | 70.5  | 186                 | 24.8  | 87.4   | 42.3               | 27.7  | 13.7  | 50.1  | 81.4  |
| Sr                                          | 507                  | 503   | 63.0                | 27.0  | 24.0   | 78.0  | 37.0                | 33.0  | 18.0  | 14.0                | 241   | 69.0   | 517                | 94.0  | 26.0  | 177   | 50.0  |
| Y                                           | 9.10                 | 7.50  | 39.0                | 30.9  | 11.0   | 21.6  | 24.2                | 14.9  | 38.3  | 18.0                | 24.3  | 26.5   | 31.8               | 23.4  | 36.2  | 23.2  | 32.0  |
| Zr                                          | 250                  | 229   | 343                 | 342   | 274    | 383   | 355                 | 350   | 501   | 334                 | 330   | 369    | 350                | 365   | 372   | 366   | 320   |
| Nb                                          | 7.81                 | 6.76  | 12.5                | 10.3  | 10.6   | 2.01  | 7.41                | 8.37  | 8.68  | 15.3                | 11.6  | 11.7   | 8.71               | 8.26  | 7.23  | 8.67  | 7.97  |
| Cs                                          | 2.73                 | 1.36  | 1.93                | 0.93  | 3.05   | 5.29  | 2.09                | 4.73  | 5.35  | 6.30                | 2.09  | 5.04   | 2.18               | 3.20  | 1.81  | 3.42  | 3.95  |
| Ba                                          | 1957                 | 1628  | 480                 | 515   | 1366   | 712   | 814                 | 1084  | 854   | 948                 | 886   | 1011   | 871                | 408   | 286   | 577   | 565   |
| La                                          | 28.9                 | 31.2  | 37.0                | 31.3  | 17.7   | 25.6  | 28.9                | 17.4  | 19.3  | 28.5                | 35.3  | 42.5   | 27.5               | 21.4  | 35.5  | 31.3  | 23.1  |
| Ce                                          | 50.8                 | 53.4  | 70.5                | 47.9  | 31.5   | 50.1  | 52.9                | 38.1  | 42.7  | 75.0                | 70.8  | 82.6   | 57.0               | 47.0  | 51.6  | 56.1  | 46.9  |

| Sample   | XL02                 | XL05 | XL03                | XL06 | XL13  | XL14 | XL15                | XL16 | XL17 | XL18                | XL19 | XL20 | XL21               | XL22 | XL23 | XL24 | XL25 |
|----------|----------------------|------|---------------------|------|-------|------|---------------------|------|------|---------------------|------|------|--------------------|------|------|------|------|
| Location | Chuzhou, early-stage |      | Chuzhou, late-stage |      |       |      | Feidong, late-stage |      |      | Lujiang, late-stage |      |      | Susong, late-stage |      |      |      |      |
| Pr       | 5.40                 | 5.49 | 8.50                | 7.52 | 3.86  | 5.91 | 5.99                | 4.42 | 5.48 | 6.96                | 7.98 | 9.25 | 7.49               | 5.87 | 9.89 | 6.29 | 6.65 |
| Nd       | 18.2                 | 18.8 | 34.2                | 30.5 | 13.0  | 22.3 | 23.0                | 15.5 | 22.4 | 24.2                | 29.8 | 32.3 | 31.2               | 23.4 | 43.0 | 23.5 | 27.8 |
| Sm       | 3.03                 | 2.97 | 6.91                | 6.21 | 2.18  | 4.40 | 4.50                | 2.75 | 5.03 | 4.29                | 5.28 | 5.90 | 6.50               | 4.79 | 8.84 | 4.28 | 5.98 |
| Eu       | 1.36                 | 0.97 | 1.62                | 1.58 | 0.58  | 1.20 | 1.33                | 0.60 | 1.12 | 0.96                | 1.34 | 1.07 | 2.33               | 1.35 | 2.25 | 1.13 | 1.31 |
| Gd       | 3.30                 | 3.09 | 7.52                | 6.35 | 2.20  | 4.67 | 5.01                | 2.87 | 5.67 | 4.43                | 5.53 | 6.17 | 7.34               | 5.09 | 9.32 | 4.74 | 6.23 |
| Tb       | 0.43                 | 0.35 | 1.30                | 1.05 | 0.32  | 0.71 | 0.76                | 0.41 | 1.07 | 0.66                | 0.75 | 0.87 | 1.24               | 0.78 | 1.41 | 0.70 | 1.00 |
| Dy       | 2.11                 | 1.54 | 7.37                | 6.23 | 1.87  | 4.10 | 4.34                | 2.53 | 6.84 | 3.85                | 4.50 | 5.28 | 6.51               | 4.60 | 7.69 | 4.17 | 6.21 |
| Ho       | 0.35                 | 0.27 | 1.50                | 1.32 | 0.40  | 0.79 | 0.86                | 0.51 | 1.50 | 0.77                | 0.88 | 1.07 | 1.39               | 0.90 | 1.50 | 0.85 | 1.28 |
| Er       | 0.92                 | 0.77 | 4.50                | 3.91 | 1.37  | 2.40 | 2.55                | 1.66 | 4.91 | 2.39                | 2.91 | 3.14 | 4.02               | 2.72 | 4.39 | 2.72 | 3.85 |
| Tm       | 0.15                 | 0.10 | 0.67                | 0.58 | 0.24  | 0.36 | 0.4                 | 0.26 | 0.78 | 0.35                | 0.42 | 0.46 | 0.67               | 0.40 | 0.63 | 0.41 | 0.57 |
| Yb       | 0.84                 | 0.61 | 4.35                | 4.05 | 1.78  | 2.59 | 2.71                | 1.79 | 5.75 | 2.56                | 3.06 | 3.13 | 3.75               | 2.78 | 4.24 | 2.86 | 3.82 |
| Lu       | 0.15                 | 0.10 | 0.70                | 0.66 | 0.30  | 0.43 | 0.44                | 0.27 | 0.87 | 0.44                | 0.50 | 0.48 | 0.69               | 0.46 | 0.64 | 0.49 | 0.60 |
| Hf       | 6.52                 | 6.14 | 9.64                | 9.12 | 7.68  | 10.2 | 9.44                | 9.64 | 13.3 | 10.1                | 9.21 | 9.90 | 9.49               | 9.56 | 9.86 | 9.53 | 8.89 |
| Ta       | 0.58                 | 0.55 | 0.83                | 0.67 | 0.77  | 0.08 | 0.49                | 0.62 | 0.59 | 0.93                | 0.75 | 0.75 | 0.64               | 0.53 | 0.47 | 0.60 | 0.60 |
| Pb       | 10.4                 | 23.1 | 5.30                | 18.4 | 8.50  | 12.6 | 5.90                | 8.00 | 42.6 | 13.3                | 19.6 | 21.3 | 12.9               | 15.5 | 8.80 | 9.20 | 11.0 |
| Th       | 3.91                 | 9.45 | 6.79                | 6.20 | 10.32 | 5.51 | 4.91                | 5.61 | 5.42 | 10.84               | 8.24 | 10.6 | 4.91               | 4.45 | 3.83 | 6.72 | 5.73 |
| U        | 0.94                 | 1.74 | 1.15                | 1.53 | 1.54  | 1.23 | 0.83                | 1.05 | 1.27 | 1.19                | 1.58 | 1.21 | 1.11               | 0.99 | 0.90 | 1.59 | 1.19 |

LOI: loss on ignition; Mg<sup>#</sup>:  $[\text{Mg}^{2+}/(\text{Mg}^{2+}+\text{Fe}^{2+})]\times 100$ .
