# Supplementary material
Source: MDPI journal article supplement (https://www.mdpi.com/2075-163X/13/4/562)
Supplement: s1 [file s1]

**Table 2.** Lu-Hf isotopic compositions of zircon grains from volcanic rocks of the Xileng Formation

| Spot No.                        | Age (Ma) | $^{176}\text{Hf}/^{177}\text{Hf}$ | $2\sigma$ | $^{176}\text{Lu}/^{177}\text{Hf}$ | $2\sigma$ | $^{176}\text{Yb}/^{177}\text{Hf}$ | $2\sigma$ | $^{176}\text{Hf}/^{177}\text{Hf}(t)$ | $\epsilon_{\text{Hf}}(t)$ | $T_{\text{DM}}$ (Ma) |
|---------------------------------|----------|-----------------------------------|-----------|-----------------------------------|-----------|-----------------------------------|-----------|--------------------------------------|---------------------------|----------------------|
| XL02, early-stage volcanic rock |          |                                   |           |                                   |           |                                   |           |                                      |                           |                      |
| XL02-1                          | 809      | 0.281728                          | 0.000016  | 0.001013                          | 0.000027  | 0.041636                          | 0.000414  | 0.281712                             | -19.7                     | 2140                 |
| XL02-2                          | 2426     | 0.280764                          | 0.000017  | 0.000434                          | 0.000016  | 0.020307                          | 0.000212  | 0.280744                             | -17.5                     | 3401                 |
| XL02-3                          | 2696     | 0.280786                          | 0.000017  | 0.000439                          | 0.000037  | 0.020642                          | 0.000535  | 0.280763                             | -10.6                     | 3372                 |
| XL02-4                          | 779      | 0.281803                          | 0.000017  | 0.001621                          | 0.000097  | 0.074551                          | 0.001585  | 0.281780                             | -17.9                     | 2069                 |
| XL02-5                          | 761      | 0.281767                          | 0.000018  | 0.001440                          | 0.000180  | 0.063906                          | 0.002288  | 0.281746                             | -19.5                     | 2110                 |
| XL02-6                          | 2063     | 0.281082                          | 0.000019  | 0.000227                          | 0.000049  | 0.011032                          | 0.000569  | 0.281073                             | -14.1                     | 2962                 |
| XL02-7                          | 1118     | 0.281733                          | 0.000018  | 0.000906                          | 0.000209  | 0.040632                          | 0.003017  | 0.281714                             | -12.7                     | 2126                 |
| XL02-8                          | 806      | 0.281964                          | 0.000021  | 0.002010                          | 0.000348  | 0.092267                          | 0.004597  | 0.281934                             | -11.9                     | 1862                 |
| XL02-9                          | 2213     | 0.281152                          | 0.000015  | 0.000250                          | 0.000018  | 0.009431                          | 0.000228  | 0.281142                             | -8.2                      | 2870                 |
| XL02-10                         | 2553     | 0.280846                          | 0.000016  | 0.000431                          | 0.000011  | 0.019674                          | 0.000056  | 0.280825                             | -11.7                     | 3292                 |
| XL02-11                         | 2609     | 0.280786                          | 0.000016  | 0.000417                          | 0.000075  | 0.019037                          | 0.001091  | 0.280765                             | -12.5                     | 3371                 |
| XL02-12                         | 2502     | 0.280774                          | 0.000019  | 0.000447                          | 0.000007  | 0.018595                          | 0.000078  | 0.280753                             | -15.4                     | 3388                 |
| XL02-13                         | 779      | 0.282047                          | 0.000024  | 0.003056                          | 0.000318  | 0.140896                          | 0.003954  | 0.282002                             | -10.1                     | 1794                 |
| XL02-14                         | 2472     | 0.280956                          | 0.000017  | 0.000461                          | 0.000008  | 0.019863                          | 0.000266  | 0.280934                             | -9.6                      | 3148                 |
| XL02-15                         | 2026     | 0.281200                          | 0.000016  | 0.000345                          | 0.000047  | 0.016232                          | 0.000707  | 0.281187                             | -10.9                     | 2813                 |
| XL06, late-stage volcanic rock  |          |                                   |           |                                   |           |                                   |           |                                      |                           |                      |
| XL06-1                          | 765      | 0.282449                          | 0.000023  | 0.003000                          | 0.000052  | 0.143813                          | 0.000446  | 0.282405                             | 3.9                       | 1200                 |
| XL06-2                          | 789      | 0.282505                          | 0.000024  | 0.003183                          | 0.000399  | 0.149065                          | 0.005738  | 0.282458                             | 6.3                       | 1123                 |
| XL06-3                          | 738      | 0.282405                          | 0.000019  | 0.002249                          | 0.000357  | 0.102089                          | 0.004644  | 0.282373                             | 2.2                       | 1239                 |
| XL06-4                          | 723      | 0.282331                          | 0.000017  | 0.001523                          | 0.000071  | 0.066439                          | 0.001086  | 0.282310                             | -0.4                      | 1320                 |
| XL06-5                          | 726      | 0.282358                          | 0.000025  | 0.001422                          | 0.000142  | 0.061504                          | 0.002164  | 0.282338                             | 0.7                       | 1279                 |
| XL06-6                          | 739      | 0.282418                          | 0.000022  | 0.002485                          | 0.000103  | 0.109601                          | 0.001613  | 0.282384                             | 2.6                       | 1228                 |
| XL06-7                          | 787      | 0.282551                          | 0.000025  | 0.004209                          | 0.000544  | 0.188156                          | 0.006533  | 0.282489                             | 7.4                       | 1084                 |
| XL06-8                          | 811      | 0.282494                          | 0.000026  | 0.003484                          | 0.000532  | 0.155888                          | 0.006159  | 0.282441                             | 6.2                       | 1149                 |
| XL06-9                          | 750      | 0.282465                          | 0.000023  | 0.003136                          | 0.000493  | 0.140364                          | 0.005779  | 0.282421                             | 4.1                       | 1181                 |
| XL06-10                         | 749      | 0.282472                          | 0.000023  | 0.002685                          | 0.000234  | 0.118333                          | 0.002565  | 0.282435                             | 4.6                       | 1155                 |
| XL06-11                         | 823      | 0.282403                          | 0.000022  | 0.003422                          | 0.000436  | 0.138462                          | 0.004286  | 0.282350                             | 3.2                       | 1283                 |

| Spot No.                       | Age (Ma) | $^{176}\text{Hf}/^{177}\text{Hf}$ | $2\sigma$ | $^{176}\text{Lu}/^{177}\text{Hf}$ | $2\sigma$ | $^{176}\text{Yb}/^{177}\text{Hf}$ | $2\sigma$ | $^{176}\text{Hf}/^{177}\text{Hf}(t)$ | $\varepsilon_{\text{Hf}}(t)$ | $T_{\text{DM}}$ (Ma) |
|--------------------------------|----------|-----------------------------------|-----------|-----------------------------------|-----------|-----------------------------------|-----------|--------------------------------------|------------------------------|----------------------|
| XL06-12                        | 780      | 0.282373                          | 0.000020  | 0.001940                          | 0.000094  | 0.083984                          | 0.001453  | 0.282345                             | 2.1                          | 1274                 |
| XL06-13                        | 801      | 0.282549                          | 0.000020  | 0.003431                          | 0.000209  | 0.154274                          | 0.003344  | 0.282498                             | 8.0                          | 1064                 |
| XL06-14                        | 765      | 0.282613                          | 0.000023  | 0.004933                          | 0.000326  | 0.220328                          | 0.005179  | 0.282542                             | 8.8                          | 1011                 |
| XL06-15                        | 815      | 0.282515                          | 0.000019  | 0.002821                          | 0.000342  | 0.125272                          | 0.003877  | 0.282472                             | 7.4                          | 1096                 |
| XL06-16                        | 806      | 0.282527                          | 0.000020  | 0.002962                          | 0.000210  | 0.138129                          | 0.001928  | 0.282482                             | 7.5                          | 1083                 |
| XL06-17                        | 800      | 0.282373                          | 0.000019  | 0.001785                          | 0.000027  | 0.074326                          | 0.000624  | 0.282346                             | 2.6                          | 1269                 |
| XL06-18                        | 747      | 0.282531                          | 0.000023  | 0.003576                          | 0.000362  | 0.156851                          | 0.005376  | 0.282481                             | 6.2                          | 1096                 |
| XL23, late-stage volcanic rock |          |                                   |           |                                   |           |                                   |           |                                      |                              |                      |
| XL23-1                         | 781      | 0.282477                          | 0.000019  | 0.003844                          | 0.000132  | 0.166469                          | 0.001335  | 0.282420                             | 4.8                          | 1187                 |
| XL23-2                         | 766      | 0.282499                          | 0.000017  | 0.002213                          | 0.000020  | 0.093276                          | 0.000680  | 0.282467                             | 6.1                          | 1101                 |
| XL23-3                         | 741      | 0.282473                          | 0.000022  | 0.001725                          | 0.000116  | 0.069549                          | 0.001192  | 0.282449                             | 4.9                          | 1124                 |
| XL23-4                         | 683      | 0.282513                          | 0.000024  | 0.002451                          | 0.000154  | 0.097510                          | 0.002122  | 0.282481                             | 4.8                          | 1088                 |
| XL23-5                         | 733      | 0.282448                          | 0.000022  | 0.002556                          | 0.000043  | 0.102739                          | 0.001127  | 0.282413                             | 3.5                          | 1186                 |
| XL23-6                         | 698      | 0.282450                          | 0.000018  | 0.001887                          | 0.000213  | 0.076780                          | 0.002532  | 0.282425                             | 3.1                          | 1162                 |
| XL23-7                         | 738      | 0.282432                          | 0.000025  | 0.005477                          | 0.000472  | 0.234975                          | 0.004624  | 0.282356                             | 1.6                          | 1315                 |
| XL23-8                         | 785      | 0.282465                          | 0.000024  | 0.002902                          | 0.000090  | 0.115948                          | 0.001004  | 0.282422                             | 5.0                          | 1173                 |
| XL23-9                         | 726      | 0.282459                          | 0.000023  | 0.002012                          | 0.000107  | 0.080920                          | 0.001687  | 0.282431                             | 4.0                          | 1153                 |
| XL23-10                        | 771      | 0.282474                          | 0.000018  | 0.001674                          | 0.000090  | 0.064040                          | 0.000812  | 0.282450                             | 5.6                          | 1121                 |
| XL23-11                        | 704      | 0.282483                          | 0.000020  | 0.002468                          | 0.000018  | 0.097610                          | 0.000298  | 0.282450                             | 4.1                          | 1133                 |
| XL23-12                        | 732      | 0.282505                          | 0.000026  | 0.001767                          | 0.000079  | 0.073996                          | 0.001678  | 0.282480                             | 5.8                          | 1080                 |
| XL23-13                        | 803      | 0.282477                          | 0.000025  | 0.004416                          | 0.000309  | 0.180610                          | 0.003348  | 0.282410                             | 4.9                          | 1206                 |
| XL23-14                        | 735      | 0.282500                          | 0.000024  | 0.002355                          | 0.000068  | 0.095464                          | 0.001238  | 0.282468                             | 5.5                          | 1104                 |
| XL23-15                        | 741      | 0.282503                          | 0.000019  | 0.003723                          | 0.000496  | 0.147592                          | 0.004783  | 0.282451                             | 5.0                          | 1143                 |
| XL23-16                        | 734      | 0.282466                          | 0.000021  | 0.002556                          | 0.000075  | 0.103274                          | 0.001178  | 0.282430                             | 4.1                          | 1161                 |
| XL23-17                        | 737      | 0.282444                          | 0.000020  | 0.002185                          | 0.000189  | 0.085263                          | 0.002565  | 0.282414                             | 3.6                          | 1180                 |
| XL23-18                        | 702      | 0.282407                          | 0.000019  | 0.002720                          | 0.000264  | 0.115324                          | 0.003523  | 0.282371                             | 1.3                          | 1253                 |
