# Supplementary material
Source: MDPI journal article supplement (https://www.mdpi.com/2075-163X/13/4/562)
Supplement: s1 [file s1]

Archive with 5 entries (5 files):
- Figure S1-revision-marked.pdf
- Table S1-WangJ2023.pdf
- Table S2-WangJ2023.pdf
- Table S3-WangJ2023.pdf
- Table S4-WangJ2023.pdf
