# Supplementary material
Source: MDPI journal article supplement (https://www.mdpi.com/2075-163X/13/4/562)
Supplement: s1 [file s1 › Figure S1-revision-marked.pdf]

**Figure S1:** Cathodoluminescence images of representative zircon grains from volcanic rocks of the Xileng Formation.

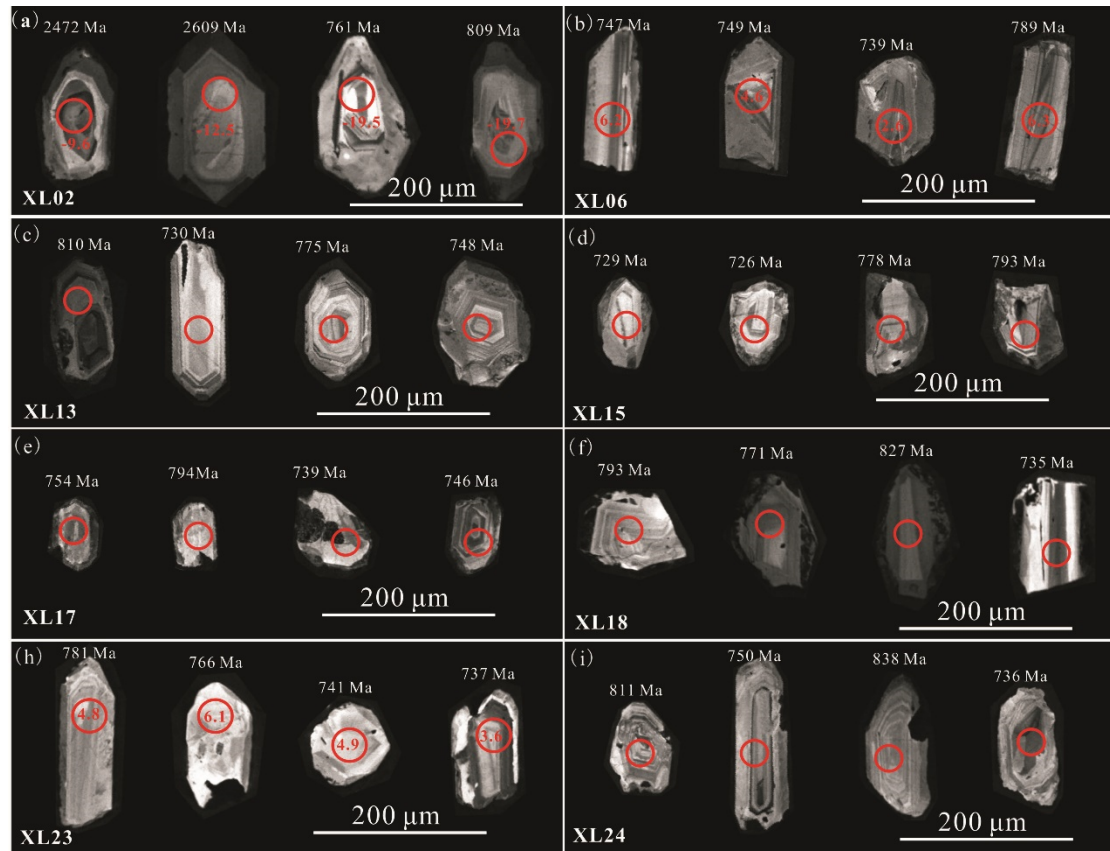

Note: Red circles represent sites of laser ablation for isotopic analysis and numbers in the circles are initial  $\epsilon_{\text{Hf}}$  values of the analytical spots.
