# Supplementary material
Source: MDPI journal article supplement (https://www.mdpi.com/2075-163X/13/4/562)
Supplement: s1 [file s1 › Table S1-WangJ2023.pdf]

**Table S1.** Zircon U-Pb isotopic data obtained by the LA-ICPMS for meta-volcanic rocks from the Xileng Formation

| Spot No.        | Th<br>(ppm) | U<br>(ppm) | Th/U | $^{207}\text{Pb}^*/^{206}\text{Pb}^*$ | 1 $\sigma$ | $^{207}\text{Pb}^*/^{235}\text{U}$ | 1 $\sigma$ | $^{206}\text{Pb}^*/^{238}\text{U}$ | 1 $\sigma$ | $^{207}\text{Pb}/^{206}\text{Pb}$<br>(Ma) | 1 $\sigma$ | $^{207}\text{Pb}/^{235}\text{U}$<br>(Ma) | 1 $\sigma$ | $^{206}\text{Pb}/^{238}\text{U}$<br>(Ma) | 1 $\sigma$ |
|-----------------|-------------|------------|------|---------------------------------------|------------|------------------------------------|------------|------------------------------------|------------|-------------------------------------------|------------|------------------------------------------|------------|------------------------------------------|------------|
| Chuzhou<br>XL02 |             |            |      |                                       |            |                                    |            |                                    |            |                                           |            |                                          |            |                                          |            |
| 1               | 136         | 190        | 0.71 | 0.0736                                | 0.0050     | 0.2628                             | 0.0195     | 0.0251                             | 0.0008     | 1031                                      | 139        | 237                                      | 16         | 160                                      | 5          |
| 2               | 75          | 44         | 1.73 | 0.1248                                | 0.0043     | 6.2778                             | 0.1890     | 0.3575                             | 0.0045     | 2026                                      | 61         | 2015                                     | 26         | 1970                                     | 21         |
| 3               | 111         | 35         | 3.16 | 0.1667                                | 0.0048     | 10.9201                            | 0.3044     | 0.4759                             | 0.0065     | 2524                                      | 48         | 2516                                     | 26         | 2509                                     | 28         |
| 4               | 153         | 310        | 0.49 | 0.1616                                | 0.0043     | 8.6619                             | 0.1952     | 0.3881                             | 0.0039     | 2472                                      | 44         | 2303                                     | 21         | 2114                                     | 18         |
| 5               | 188         | 121        | 1.56 | 0.0703                                | 0.0028     | 1.0278                             | 0.0415     | 0.1095                             | 0.0022     | 1000                                      | 83         | 718                                      | 21         | 670                                      | 13         |
| 6               | 416         | 109        | 3.81 | 0.0701                                | 0.0037     | 1.1863                             | 0.0575     | 0.1252                             | 0.0023     | 931                                       | 108        | 794                                      | 27         | 761                                      | 13         |
| 7               | 192         | 114        | 1.67 | 0.0766                                | 0.0040     | 1.3174                             | 0.0579     | 0.1279                             | 0.0021     | 1109                                      | 100        | 853                                      | 25         | 776                                      | 12         |
| 8               | 45          | 79         | 0.57 | 0.0933                                | 0.0051     | 0.9445                             | 0.0656     | 0.0727                             | 0.0030     | 1494                                      | 103        | 675                                      | 34         | 452                                      | 18         |
| 9               | 165         | 182        | 0.91 | 0.1694                                | 0.0047     | 9.5456                             | 0.2106     | 0.4024                             | 0.0051     | 2552                                      | 46         | 2392                                     | 20         | 2180                                     | 24         |
| 10              | 95          | 129        | 0.74 | 0.1644                                | 0.0049     | 9.4320                             | 0.2734     | 0.4120                             | 0.0055     | 2502                                      | 50         | 2381                                     | 27         | 2224                                     | 25         |
| 11              | 443         | 146        | 3.03 | 0.0701                                | 0.0028     | 1.2323                             | 0.0447     | 0.1285                             | 0.0020     | 931                                       | 80         | 815                                      | 20         | 779                                      | 11         |
| 12              | 97          | 117        | 0.83 | 0.1753                                | 0.0045     | 10.7891                            | 0.2500     | 0.4486                             | 0.0051     | 2609                                      | 43         | 2505                                     | 22         | 2389                                     | 23         |
| 13              | 244         | 295        | 0.83 | 0.2849                                | 0.0062     | 21.9949                            | 0.4737     | 0.5646                             | 0.0068     | 3390                                      | 29         | 3184                                     | 21         | 2886                                     | 28         |
| 14              | 110         | 194        | 0.56 | 0.0763                                | 0.0044     | 0.2669                             | 0.0129     | 0.0258                             | 0.0004     | 1106                                      | 117        | 240                                      | 10         | 164                                      | 3          |
| 15              | 76          | 104        | 0.73 | 0.1274                                | 0.0039     | 6.7605                             | 0.1668     | 0.3740                             | 0.0041     | 2063                                      | 55         | 2081                                     | 22         | 2048                                     | 19         |
| 16              | 57          | 130        | 0.44 | 0.1389                                | 0.0044     | 6.1469                             | 0.1710     | 0.3250                             | 0.0059     | 2213                                      | 88         | 1997                                     | 24         | 1814                                     | 29         |
| 17              | 112         | 195        | 0.57 | 0.1495                                | 0.0102     | 0.5122                             | 0.0368     | 0.0250                             | 0.0006     | 2340                                      | 118        | 420                                      | 25         | 159                                      | 4          |
| 18              | 246         | 122        | 2.01 | 0.0730                                | 0.0034     | 1.3794                             | 0.0555     | 0.1332                             | 0.0016     | 1013                                      | 94         | 880                                      | 24         | 806                                      | 9          |
| 19              | 111         | 57         | 1.94 | 0.0769                                | 0.0043     | 1.6444                             | 0.0828     | 0.1537                             | 0.0028     | 1118                                      | 107        | 987                                      | 32         | 922                                      | 15         |
| 20              | 58          | 83         | 0.71 | 0.1650                                | 0.0123     | 0.5029                             | 0.0319     | 0.0234                             | 0.0007     | 2507                                      | 126        | 414                                      | 22         | 149                                      | 4          |
| 21              | 135         | 159        | 0.85 | 0.1695                                | 0.0053     | 10.4534                            | 0.2873     | 0.4439                             | 0.0044     | 2553                                      | 53         | 2476                                     | 26         | 2368                                     | 20         |
| 22              | 55          | 75         | 0.73 | 0.1697                                | 0.0055     | 11.2340                            | 0.3182     | 0.4778                             | 0.0055     | 2555                                      | 55         | 2543                                     | 26         | 2517                                     | 24         |
| 23              | 142         | 83         | 1.70 | 0.0663                                | 0.0032     | 1.1596                             | 0.0505     | 0.1253                             | 0.0018     | 817                                       | 106        | 782                                      | 24         | 761                                      | 11         |
| 24              | 257         | 322        | 0.80 | 0.2386                                | 0.0062     | 19.2719                            | 0.4669     | 0.5713                             | 0.0063     | 3111                                      | 41         | 3056                                     | 23         | 2913                                     | 26         |
| 25              | 59          | 95         | 0.62 | 0.0810                                | 0.0091     | 0.2396                             | 0.0203     | 0.0225                             | 0.0007     | 1233                                      | 223        | 218                                      | 17         | 144                                      | 4          |
| 26              | 178         | 372        | 0.48 | 0.1847                                | 0.0043     | 12.0279                            | 0.3069     | 0.4702                             | 0.0059     | 2696                                      | 44         | 2607                                     | 24         | 2485                                     | 26         |
| 27              | 75          | 180        | 0.42 | 0.1572                                | 0.0033     | 8.6847                             | 0.1840     | 0.4008                             | 0.0042     | 2426                                      | 35         | 2305                                     | 19         | 2173                                     | 19         |
| 28              | 117         | 98         | 1.19 | 0.0700                                | 0.0028     | 1.2811                             | 0.0476     | 0.1337                             | 0.0017     | 928                                       | 83         | 837                                      | 21         | 809                                      | 10         |
| 29              | 147         | 249        | 0.59 | 0.1581                                | 0.0035     | 8.0250                             | 0.1730     | 0.3693                             | 0.0049     | 2435                                      | 37         | 2234                                     | 20         | 2026                                     | 23         |
| 30              | 596         | 610        | 0.98 | 0.1800                                | 0.0047     | 11.6490                            | 0.4298     | 0.4641                             | 0.0116     | 2653                                      | 43         | 2577                                     | 35         | 2458                                     | 51         |

| Spot No. | Th<br>(ppm) | U<br>(ppm) | Th/U | $^{207}\text{Pb}^*/^{206}\text{Pb}^*$ | 1 $\sigma$ | $^{207}\text{Pb}^*/^{235}\text{U}$ | 1 $\sigma$ | $^{206}\text{Pb}^*/^{238}\text{U}$ | 1 $\sigma$ | $^{207}\text{Pb}/^{206}\text{Pb}$<br>(Ma) | 1 $\sigma$ | $^{207}\text{Pb}/^{235}\text{U}$<br>(Ma) | 1 $\sigma$ | $^{206}\text{Pb}/^{238}\text{U}$<br>(Ma) | 1 $\sigma$ |
|----------|-------------|------------|------|---------------------------------------|------------|------------------------------------|------------|------------------------------------|------------|-------------------------------------------|------------|------------------------------------------|------------|------------------------------------------|------------|
| 31       | 164         | 235        | 0.70 | 0.1299                                | 0.0042     | 6.6684                             | 0.2223     | 0.3727                             | 0.0062     | 2098                                      | 56         | 2068                                     | 29         | 2042                                     | 29         |
| 32       | 234         | 267        | 0.88 | 0.0750                                | 0.0041     | 1.3736                             | 0.0679     | 0.1345                             | 0.0022     | 1133                                      | 109        | 878                                      | 29         | 813                                      | 13         |
| 33       | 200         | 158        | 1.26 | 0.0646                                | 0.0043     | 1.1636                             | 0.0747     | 0.1290                             | 0.0034     | 761                                       | 139        | 784                                      | 35         | 782                                      | 19         |
| 34       | 190         | 267        | 0.71 | 0.0742                                | 0.0049     | 1.2913                             | 0.0797     | 0.1256                             | 0.0027     | 1056                                      | 134        | 842                                      | 35         | 763                                      | 15         |
| 35       | 170         | 220        | 0.77 | 0.1436                                | 0.0051     | 8.1663                             | 0.3046     | 0.4120                             | 0.0066     | 2272                                      | 61         | 2250                                     | 34         | 2224                                     | 30         |
| 36       | 420         | 582        | 0.72 | 0.1797                                | 0.0054     | 11.4359                            | 0.4179     | 0.4573                             | 0.0085     | 2650                                      | 50         | 2559                                     | 34         | 2427                                     | 38         |
| 37       | 86          | 180        | 0.48 | 0.1663                                | 0.0069     | 10.5332                            | 0.4653     | 0.4605                             | 0.0091     | 2520                                      | 69         | 2483                                     | 41         | 2442                                     | 40         |
| 38       | 391         | 257        | 1.52 | 0.0739                                | 0.0039     | 1.3096                             | 0.0694     | 0.1306                             | 0.0028     | 1039                                      | 108        | 850                                      | 31         | 791                                      | 16         |
| 39       | 99          | 195        | 0.51 | 0.1301                                | 0.0060     | 6.6151                             | 0.3555     | 0.3717                             | 0.0132     | 2100                                      | 86         | 2061                                     | 47         | 2037                                     | 62         |
| 40       | 338         | 372        | 0.91 | 0.1660                                | 0.0053     | 11.3089                            | 0.3510     | 0.4894                             | 0.0077     | 2518                                      | 55         | 2549                                     | 29         | 2568                                     | 33         |
| 41       | 32          | 87         | 0.37 | 0.1561                                | 0.0078     | 8.9752                             | 0.4233     | 0.4210                             | 0.0123     | 2414                                      | 85         | 2335                                     | 43         | 2265                                     | 56         |
| 42       | 194         | 446        | 0.43 | 0.0644                                | 0.0076     | 0.2115                             | 0.0190     | 0.0210                             | 0.0006     | 754                                       | 252        | 195                                      | 16         | 134                                      | 4          |
| 43       | 442         | 324        | 1.37 | 0.0665                                | 0.0032     | 1.2283                             | 0.0589     | 0.1330                             | 0.0024     | 833                                       | 101        | 814                                      | 27         | 805                                      | 14         |
| 44       | 164         | 236        | 0.70 | 0.0948                                | 0.0072     | 1.0546                             | 0.0715     | 0.0798                             | 0.0021     | 1524                                      | 143        | 731                                      | 35         | 495                                      | 13         |
| 45       | 302         | 280        | 1.08 | 0.0675                                | 0.0038     | 1.2609                             | 0.0622     | 0.1327                             | 0.0033     | 854                                       | 110        | 828                                      | 28         | 803                                      | 19         |
| 46       | 368         | 377        | 0.98 | 0.1779                                | 0.0050     | 12.2901                            | 0.3368     | 0.4981                             | 0.0069     | 2633                                      | 46         | 2627                                     | 26         | 2606                                     | 30         |
| 47       | 319         | 462        | 0.69 | 0.0528                                | 0.0068     | 0.1672                             | 0.0153     | 0.0213                             | 0.0007     | 320                                       | 270        | 157                                      | 13         | 136                                      | 4          |
| 48       | 205         | 207        | 0.99 | 0.0719                                | 0.0038     | 1.3185                             | 0.0663     | 0.1342                             | 0.0026     | 983                                       | 107        | 854                                      | 29         | 812                                      | 15         |
| 49       | 235         | 300        | 0.79 | 0.0713                                | 0.0095     | 0.2732                             | 0.0283     | 0.0227                             | 0.0010     | 969                                       | 242        | 245                                      | 23         | 144                                      | 7          |
| 50       | 795         | 1084       | 0.73 | 0.1596                                | 0.0051     | 7.7772                             | 0.3592     | 0.3458                             | 0.0113     | 2451                                      | 55         | 2206                                     | 42         | 1914                                     | 54         |
| 51       | 167         | 256        | 0.65 | 0.0801                                | 0.0132     | 0.2420                             | 0.0198     | 0.0199                             | 0.0008     | 1200                                      | 330        | 220                                      | 16         | 127                                      | 5          |
| 52       | 169         | 348        | 0.49 | 0.1488                                | 0.0043     | 8.9937                             | 0.2653     | 0.4359                             | 0.0061     | 2332                                      | 49         | 2337                                     | 27         | 2332                                     | 28         |
| 53       | 204         | 777        | 0.26 | 0.0493                                | 0.0034     | 0.1400                             | 0.0096     | 0.0202                             | 0.0004     | 161                                       | 156        | 133                                      | 9          | 129                                      | 3          |
| 54       | 1553        | 1386       | 1.12 | 0.1597                                | 0.0044     | 9.9114                             | 0.2915     | 0.4478                             | 0.0057     | 2453                                      | 47         | 2427                                     | 27         | 2385                                     | 25         |
| 55       | 256         | 430        | 0.60 | 0.0585                                | 0.0047     | 0.2660                             | 0.0201     | 0.0333                             | 0.0009     | 550                                       | 176        | 239                                      | 16         | 211                                      | 6          |
| 56       | 1032        | 450        | 2.29 | 0.0661                                | 0.0038     | 1.1924                             | 0.0629     | 0.1280                             | 0.0024     | 809                                       | 120        | 797                                      | 29         | 776                                      | 14         |
| 57       | 1050        | 923        | 1.14 | 0.0665                                | 0.0036     | 1.2261                             | 0.0675     | 0.1334                             | 0.0024     | 820                                       | 112        | 813                                      | 31         | 807                                      | 14         |
| 58       | 390         | 925        | 0.42 | 0.1540                                | 0.0043     | 10.3533                            | 0.2936     | 0.4829                             | 0.0057     | 2390                                      | 48         | 2467                                     | 26         | 2540                                     | 25         |
| 59       | 354         | 583        | 0.61 | 0.1795                                | 0.0045     | 13.4899                            | 0.3501     | 0.5380                             | 0.0077     | 2650                                      | 42         | 2715                                     | 25         | 2775                                     | 32         |
| 60       | 605         | 710        | 0.85 | 0.1487                                | 0.0038     | 9.5388                             | 0.2456     | 0.4570                             | 0.0063     | 2331                                      | 44         | 2391                                     | 24         | 2426                                     | 28         |
| XL06     |             |            |      |                                       |            |                                    |            |                                    |            |                                           |            |                                          |            |                                          |            |
| 1        | 474         | 385        | 1.23 | 0.0708                                | 0.0027     | 1.2661                             | 0.0412     | 0.1310                             | 0.0015     | 954                                       | 78         | 831                                      | 18         | 793                                      | 9          |
| 2        | 254         | 239        | 1.06 | 0.0732                                | 0.0075     | 1.3363                             | 0.1262     | 0.1227                             | 0.0031     | 1020                                      | 209        | 862                                      | 55         | 746                                      | 18         |

| Spot No. | Th<br>(ppm) | U<br>(ppm) | Th/U | $^{207}\text{Pb}^*/^{206}\text{Pb}^*$ | 1 $\sigma$ | $^{207}\text{Pb}^*/^{235}\text{U}$ | 1 $\sigma$ | $^{206}\text{Pb}^*/^{238}\text{U}$ | 1 $\sigma$ | $^{207}\text{Pb}/^{206}\text{Pb}$<br>(Ma) | 1 $\sigma$ | $^{207}\text{Pb}/^{235}\text{U}$<br>(Ma) | 1 $\sigma$ | $^{206}\text{Pb}/^{238}\text{U}$<br>(Ma) | 1 $\sigma$ |
|----------|-------------|------------|------|---------------------------------------|------------|------------------------------------|------------|------------------------------------|------------|-------------------------------------------|------------|------------------------------------------|------------|------------------------------------------|------------|
| 3        | 411         | 349        | 1.18 | 0.0797                                | 0.0050     | 1.2850                             | 0.0818     | 0.1229                             | 0.0027     | 1191                                      | 124        | 839                                      | 36         | 747                                      | 16         |
| 4        | 259         | 302        | 0.86 | 0.0696                                | 0.0033     | 1.2070                             | 0.0456     | 0.1322                             | 0.0021     | 917                                       | 97         | 804                                      | 21         | 800                                      | 12         |
| 5        | 402         | 372        | 1.08 | 0.0790                                | 0.0052     | 1.3479                             | 0.0783     | 0.1305                             | 0.0029     | 1172                                      | 131        | 867                                      | 34         | 791                                      | 17         |
| 6        | 135         | 197        | 0.68 | 0.0764                                | 0.0039     | 1.3751                             | 0.0656     | 0.1365                             | 0.0027     | 1106                                      | 103        | 878                                      | 28         | 825                                      | 15         |
| 7        | 271         | 367        | 0.74 | 0.0707                                | 0.0028     | 1.2558                             | 0.0433     | 0.1331                             | 0.0017     | 948                                       | 80         | 826                                      | 20         | 806                                      | 9          |
| 8        | 200         | 293        | 0.68 | 0.0702                                | 0.0029     | 1.2695                             | 0.0449     | 0.1347                             | 0.0019     | 1000                                      | 83         | 832                                      | 20         | 815                                      | 11         |
| 9        | 104         | 113        | 0.92 | 0.0907                                | 0.0061     | 1.5729                             | 0.0806     | 0.1306                             | 0.0036     | 1443                                      | 129        | 960                                      | 32         | 791                                      | 21         |
| 10       | 1108        | 806        | 1.38 | 0.0643                                | 0.0019     | 1.1108                             | 0.0301     | 0.1260                             | 0.0013     | 750                                       | 63         | 759                                      | 14         | 765                                      | 7          |
| 11       | 274         | 342        | 0.80 | 0.0652                                | 0.0028     | 1.1595                             | 0.0503     | 0.1285                             | 0.0019     | 789                                       | 95         | 782                                      | 24         | 780                                      | 11         |
| 12       | 268         | 290        | 0.93 | 0.0708                                | 0.0031     | 1.2939                             | 0.0545     | 0.1323                             | 0.0018     | 950                                       | 89         | 843                                      | 24         | 801                                      | 10         |
| 13       | 291         | 313        | 0.93 | 0.0726                                | 0.0081     | 1.3368                             | 0.1167     | 0.1362                             | 0.0042     | 1011                                      | 223        | 862                                      | 51         | 823                                      | 24         |
| 14       | 2789        | 3530       | 0.79 | 0.1703                                | 0.0055     | 1.7215                             | 0.0853     | 0.0712                             | 0.0017     | 2561                                      | 54         | 1017                                     | 32         | 443                                      | 10         |
| 15       | 799         | 654        | 1.22 | 0.0731                                | 0.0028     | 1.2359                             | 0.0410     | 0.1223                             | 0.0018     | 1017                                      | 81         | 817                                      | 19         | 744                                      | 10         |
| 16       | 621         | 452        | 1.37 | 0.2064                                | 0.0105     | 4.7578                             | 0.2637     | 0.1515                             | 0.0029     | 2880                                      | 82         | 1777                                     | 47         | 909                                      | 16         |
| 17       | 220         | 242        | 0.91 | 0.0749                                | 0.0043     | 1.3091                             | 0.0706     | 0.1276                             | 0.0022     | 1066                                      | 121        | 850                                      | 31         | 774                                      | 13         |
| 18       | 502         | 487        | 1.03 | 0.0644                                | 0.0022     | 1.0979                             | 0.0339     | 0.1231                             | 0.0016     | 767                                       | 72         | 752                                      | 16         | 749                                      | 9          |
| 19       | 998         | 731        | 1.36 | 0.0696                                | 0.0055     | 1.1961                             | 0.0959     | 0.1234                             | 0.0039     | 917                                       | 163        | 799                                      | 44         | 750                                      | 23         |
| 20       | 210         | 307        | 0.68 | 0.0652                                | 0.0028     | 1.2101                             | 0.0495     | 0.1339                             | 0.0019     | 789                                       | 95         | 805                                      | 23         | 810                                      | 11         |
| 21       | 556         | 439        | 1.27 | 0.1439                                | 0.0088     | 3.0110                             | 0.1174     | 0.1335                             | 0.0026     | 2276                                      | 105        | 1410                                     | 30         | 808                                      | 15         |
| 22       | 495         | 601        | 0.82 | 0.0749                                | 0.0030     | 1.2521                             | 0.0418     | 0.1245                             | 0.0029     | 1065                                      | 80         | 824                                      | 19         | 757                                      | 17         |
| 23       | 451         | 319        | 1.41 | 0.0775                                | 0.0051     | 1.4095                             | 0.0762     | 0.1341                             | 0.0032     | 1144                                      | 133        | 893                                      | 32         | 811                                      | 18         |
| 24       | 499         | 409        | 1.22 | 0.0745                                | 0.0044     | 1.3129                             | 0.0691     | 0.1298                             | 0.0021     | 1057                                      | 120        | 851                                      | 30         | 787                                      | 12         |
| 25       | 1078        | 1166       | 0.92 | 0.0722                                | 0.0028     | 1.1998                             | 0.0442     | 0.1222                             | 0.0015     | 994                                       | 74         | 800                                      | 20         | 743                                      | 9          |
| 26       | 265         | 243        | 1.09 | 0.0763                                | 0.0051     | 1.2372                             | 0.0746     | 0.1215                             | 0.0023     | 1103                                      | 133        | 818                                      | 34         | 739                                      | 13         |
| 27       | 266         | 371        | 0.72 | 0.0738                                | 0.0032     | 1.1781                             | 0.0527     | 0.1192                             | 0.0020     | 1037                                      | 89         | 790                                      | 25         | 726                                      | 12         |
| 28       | 693         | 451        | 1.54 | 0.0753                                | 0.0037     | 1.1708                             | 0.0494     | 0.1186                             | 0.0021     | 1077                                      | 99         | 787                                      | 23         | 723                                      | 12         |
| 29       | 429         | 326        | 1.31 | 0.0890                                | 0.0038     | 1.4696                             | 0.0574     | 0.1254                             | 0.0018     | 1406                                      | 82         | 918                                      | 24         | 762                                      | 10         |
| 30       | 172         | 214        | 0.80 | 0.0746                                | 0.0043     | 1.2768                             | 0.0684     | 0.1303                             | 0.0024     | 1058                                      | 117        | 835                                      | 31         | 789                                      | 13         |
| 31       | 198         | 231        | 0.86 | 0.0721                                | 0.0033     | 1.2034                             | 0.0478     | 0.1213                             | 0.0020     | 991                                       | 93         | 802                                      | 22         | 738                                      | 12         |
| 32       | 441         | 488        | 0.90 | 0.0677                                | 0.0027     | 1.1919                             | 0.0397     | 0.1260                             | 0.0017     | 859                                       | 81         | 797                                      | 18         | 765                                      | 9          |
| XL13     |             |            |      |                                       |            |                                    |            |                                    |            |                                           |            |                                          |            |                                          |            |
| 1        | 85          | 81         | 1.05 | 0.0661                                | 0.0027     | 1.1376                             | 0.0437     | 0.1253                             | 0.0018     | 811                                       | 85         | 771                                      | 21         | 761                                      | 10         |
| 2        | 854         | 494        | 1.73 | 0.0736                                | 0.0025     | 1.0458                             | 0.0329     | 0.1026                             | 0.0015     | 1031                                      | 68         | 727                                      | 16         | 630                                      | 9          |

| Spot No.     | Th<br>(ppm) | U<br>(ppm) | Th/U | $^{207}\text{Pb}^*/^{206}\text{Pb}^*$ | 1 $\sigma$ | $^{207}\text{Pb}^*/^{235}\text{U}$ | 1 $\sigma$ | $^{206}\text{Pb}^*/^{238}\text{U}$ | 1 $\sigma$ | $^{207}\text{Pb}/^{206}\text{Pb}$<br>(Ma) | 1 $\sigma$ | $^{207}\text{Pb}/^{235}\text{U}$<br>(Ma) | 1 $\sigma$ | $^{206}\text{Pb}/^{238}\text{U}$<br>(Ma) | 1 $\sigma$ |
|--------------|-------------|------------|------|---------------------------------------|------------|------------------------------------|------------|------------------------------------|------------|-------------------------------------------|------------|------------------------------------------|------------|------------------------------------------|------------|
| 3            | 168         | 117        | 1.44 | 0.0675                                | 0.0036     | 1.1304                             | 0.0602     | 0.1213                             | 0.0022     | 854                                       | 113        | 768                                      | 29         | 738                                      | 13         |
| 4            | 101         | 83         | 1.20 | 0.0726                                | 0.0029     | 1.3243                             | 0.0475     | 0.1339                             | 0.0023     | 1011                                      | 80         | 856                                      | 21         | 810                                      | 13         |
| 5            | 29          | 23         | 1.29 | 0.3599                                | 0.0168     | 11.7068                            | 0.7675     | 0.2267                             | 0.0096     | 3750                                      | 72         | 2581                                     | 61         | 1317                                     | 51         |
| 6            | 277         | 151        | 1.83 | 0.0668                                | 0.0024     | 1.1892                             | 0.0452     | 0.1278                             | 0.0019     | 831                                       | 76         | 796                                      | 21         | 775                                      | 11         |
| 7            | 43          | 42         | 1.01 | 0.0637                                | 0.0034     | 1.1881                             | 0.0629     | 0.1354                             | 0.0024     | 731                                       | 113        | 795                                      | 29         | 819                                      | 13         |
| 8            | 141         | 141        | 1.00 | 0.0614                                | 0.0026     | 1.0454                             | 0.0423     | 0.1231                             | 0.0021     | 654                                       | 91         | 727                                      | 21         | 748                                      | 12         |
| 9            | 148         | 116        | 1.27 | 0.0884                                | 0.0061     | 1.7603                             | 0.1361     | 0.1415                             | 0.0020     | 1392                                      | 133        | 1031                                     | 50         | 853                                      | 12         |
| 10           | 511         | 305        | 1.68 | 0.0678                                | 0.0022     | 1.1629                             | 0.0347     | 0.1230                             | 0.0018     | 865                                       | 67         | 783                                      | 16         | 748                                      | 10         |
| 11           | 3580        | 1276       | 2.81 | 0.1224                                | 0.0029     | 2.0286                             | 0.0492     | 0.1194                             | 0.0011     | 1992                                      | 42         | 1125                                     | 17         | 727                                      | 7          |
| 12           | 134         | 115        | 1.17 | 0.0685                                | 0.0030     | 1.2488                             | 0.0524     | 0.1323                             | 0.0022     | 883                                       | 91         | 823                                      | 24         | 801                                      | 13         |
| 13           | 157         | 104        | 1.51 | 0.0730                                | 0.0036     | 1.2943                             | 0.0660     | 0.1301                             | 0.0021     | 1013                                      | 101        | 843                                      | 29         | 789                                      | 12         |
| 14           | 55          | 56         | 0.97 | 0.0681                                | 0.0035     | 1.1833                             | 0.0556     | 0.1306                             | 0.0022     | 872                                       | 106        | 793                                      | 26         | 792                                      | 12         |
| 15           | 49          | 48         | 1.03 | 0.0768                                | 0.0053     | 1.3056                             | 0.0922     | 0.1269                             | 0.0028     | 1117                                      | 140        | 848                                      | 41         | 770                                      | 16         |
| 16           | 67          | 60         | 1.12 | 0.0699                                | 0.0037     | 1.1671                             | 0.0557     | 0.1297                             | 0.0023     | 928                                       | 109        | 785                                      | 26         | 786                                      | 13         |
| 17           | 77          | 76         | 1.02 | 0.0711                                | 0.0036     | 1.2330                             | 0.0545     | 0.1326                             | 0.0021     | 961                                       | 104        | 816                                      | 25         | 803                                      | 12         |
| 18           | 197         | 104        | 1.90 | 0.0763                                | 0.0038     | 1.2289                             | 0.0551     | 0.1213                             | 0.0019     | 1103                                      | 100        | 814                                      | 25         | 738                                      | 11         |
| 19           | 990         | 622        | 1.59 | 0.1119                                | 0.0039     | 1.7155                             | 0.0586     | 0.1125                             | 0.0011     | 1831                                      | 63         | 1014                                     | 22         | 687                                      | 7          |
| 20           | 188         | 129        | 1.46 | 0.0712                                | 0.0034     | 1.3224                             | 0.0559     | 0.1370                             | 0.0020     | 961                                       | 98         | 856                                      | 24         | 827                                      | 11         |
| 21           | 171         | 282        | 0.61 | 0.0694                                | 0.0023     | 1.2297                             | 0.0350     | 0.1247                             | 0.0013     | 922                                       | 67         | 814                                      | 16         | 758                                      | 7          |
| 22           | 97          | 120        | 0.81 | 0.0634                                | 0.0025     | 1.0512                             | 0.0405     | 0.1211                             | 0.0017     | 720                                       | 282        | 729                                      | 20         | 737                                      | 10         |
| 23           | 157         | 157        | 1.00 | 0.0649                                | 0.0026     | 1.0782                             | 0.0402     | 0.1213                             | 0.0014     | 770                                       | 85         | 743                                      | 20         | 738                                      | 8          |
| 24           | 403         | 468        | 0.86 | 0.0780                                | 0.0029     | 1.3718                             | 0.0500     | 0.1316                             | 0.0038     | 1147                                      | 74         | 877                                      | 21         | 797                                      | 22         |
| 25           | 45          | 44         | 1.01 | 0.0796                                | 0.0052     | 1.4273                             | 0.0878     | 0.1327                             | 0.0029     | 1187                                      | 130        | 900                                      | 37         | 803                                      | 17         |
| 26           | 53          | 54         | 0.99 | 0.0731                                | 0.0054     | 1.2365                             | 0.0950     | 0.1245                             | 0.0031     | 1017                                      | 153        | 817                                      | 43         | 756                                      | 18         |
| 27           | 131         | 98         | 1.33 | 0.0730                                | 0.0029     | 1.3341                             | 0.0532     | 0.1342                             | 0.0019     | 1015                                      | 81         | 861                                      | 23         | 812                                      | 11         |
| 28           | 135         | 103        | 1.31 | 0.0738                                | 0.0032     | 1.2241                             | 0.0527     | 0.1234                             | 0.0019     | 1035                                      | 87         | 812                                      | 24         | 750                                      | 11         |
| 29           | 77          | 66         | 1.16 | 0.0691                                | 0.0037     | 1.2110                             | 0.0551     | 0.1242                             | 0.0022     | 902                                       | 111        | 806                                      | 25         | 755                                      | 13         |
| 30           | 142         | 81         | 1.75 | 0.0719                                | 0.0032     | 1.2500                             | 0.0533     | 0.1295                             | 0.0020     | 983                                       | 117        | 823                                      | 24         | 785                                      | 12         |
| 31           | 107         | 72         | 1.49 | 0.0789                                | 0.0038     | 1.4161                             | 0.0656     | 0.1340                             | 0.0025     | 1169                                      | 94         | 896                                      | 28         | 811                                      | 14         |
| 32           | 754         | 447        | 1.69 | 0.0699                                | 0.0025     | 1.1183                             | 0.0349     | 0.1179                             | 0.0015     | 928                                       | 72         | 762                                      | 17         | 718                                      | 9          |
| Feidong XL15 |             |            |      |                                       |            |                                    |            |                                    |            |                                           |            |                                          |            |                                          |            |
| 1            | 72          | 46         | 1.55 | 0.0794                                | 0.0067     | 1.2070                             | 0.0950     | 0.1197                             | 0.0029     | 1181                                      | 167        | 804                                      | 44         | 729                                      | 17         |

| Spot No. | Th<br>(ppm) | U<br>(ppm) | Th/U | $^{207}\text{Pb}^*/^{206}\text{Pb}^*$ | 1 $\sigma$ | $^{207}\text{Pb}^*/^{235}\text{U}$ | 1 $\sigma$ | $^{206}\text{Pb}^*/^{238}\text{U}$ | 1 $\sigma$ | $^{207}\text{Pb}/^{206}\text{Pb}$<br>(Ma) | 1 $\sigma$ | $^{207}\text{Pb}/^{235}\text{U}$<br>(Ma) | 1 $\sigma$ | $^{206}\text{Pb}/^{238}\text{U}$<br>(Ma) | 1 $\sigma$ |
|----------|-------------|------------|------|---------------------------------------|------------|------------------------------------|------------|------------------------------------|------------|-------------------------------------------|------------|------------------------------------------|------------|------------------------------------------|------------|
| 2        | 1483        | 534        | 2.78 | 0.0724                                | 0.0021     | 1.1543                             | 0.0334     | 0.1158                             | 0.0013     | 998                                       | 29         | 779                                      | 16         | 706                                      | 8          |
| 3        | 133         | 69         | 1.92 | 0.1018                                | 0.0053     | 1.7083                             | 0.0817     | 0.1246                             | 0.0025     | 1658                                      | 96         | 1012                                     | 31         | 757                                      | 14         |
| 4        | 1301        | 398        | 3.27 | 0.0712                                | 0.0027     | 1.1874                             | 0.0475     | 0.1193                             | 0.0016     | 962                                       | 78         | 795                                      | 22         | 726                                      | 9          |
| 5        | 298         | 129        | 2.31 | 0.1758                                | 0.0072     | 3.1896                             | 0.1334     | 0.1307                             | 0.0026     | 2614                                      | 69         | 1455                                     | 32         | 792                                      | 15         |
| 6        | 775         | 349        | 2.22 | 0.0674                                | 0.0021     | 1.0914                             | 0.0313     | 0.1179                             | 0.0012     | 850                                       | 68         | 749                                      | 15         | 718                                      | 7          |
| 7        | 890         | 394        | 2.26 | 0.0719                                | 0.0022     | 1.1129                             | 0.0323     | 0.1125                             | 0.0016     | 983                                       | 68         | 760                                      | 16         | 688                                      | 9          |
| 8        | 477         | 184        | 2.59 | 0.0663                                | 0.0027     | 1.1307                             | 0.0397     | 0.1256                             | 0.0018     | 817                                       | 85         | 768                                      | 19         | 763                                      | 11         |
| 9        | 110         | 59         | 1.87 | 0.0725                                | 0.0041     | 1.2887                             | 0.0646     | 0.1283                             | 0.0026     | 1000                                      | 121        | 841                                      | 29         | 778                                      | 15         |
| 10       | 52          | 46         | 1.14 | 0.0597                                | 0.0038     | 1.0424                             | 0.0634     | 0.1181                             | 0.0023     | 594                                       | 139        | 725                                      | 32         | 720                                      | 13         |
| 11       | 60          | 45         | 1.33 | 0.0634                                | 0.0035     | 1.1976                             | 0.0585     | 0.1308                             | 0.0023     | 724                                       | 112        | 799                                      | 27         | 793                                      | 13         |
| 12       | 128         | 109        | 1.18 | 0.0682                                | 0.0028     | 1.1130                             | 0.0426     | 0.1168                             | 0.0018     | 876                                       | 86         | 760                                      | 20         | 712                                      | 10         |
| 13       | 64          | 59         | 1.09 | 0.0713                                | 0.0042     | 1.2855                             | 0.0795     | 0.1309                             | 0.0025     | 965                                       | 121        | 839                                      | 35         | 793                                      | 14         |
| 14       | 53          | 36         | 1.47 | 0.0738                                | 0.0047     | 1.3332                             | 0.0836     | 0.1292                             | 0.0028     | 1035                                      | 130        | 860                                      | 36         | 783                                      | 16         |
| 15       | 980         | 384        | 2.55 | 0.0692                                | 0.0022     | 1.1392                             | 0.0318     | 0.1200                             | 0.0012     | 906                                       | 65         | 772                                      | 15         | 730                                      | 7          |
| 16       | 389         | 208        | 1.87 | 0.0718                                | 0.0024     | 1.2817                             | 0.0415     | 0.1305                             | 0.0017     | 981                                       | 69         | 838                                      | 18         | 791                                      | 10         |
| 17       | 411         | 1250       | 0.33 | 0.0656                                | 0.0021     | 0.8965                             | 0.0250     | 0.0970                             | 0.0015     | 794                                       | 67         | 650                                      | 13         | 597                                      | 9          |
| 18       | 810         | 433        | 1.87 | 0.0752                                | 0.0026     | 1.3446                             | 0.0516     | 0.1305                             | 0.0029     | 1074                                      | 66         | 865                                      | 22         | 791                                      | 17         |
| 19       | 185         | 128        | 1.44 | 0.0753                                | 0.0030     | 1.3556                             | 0.0545     | 0.1311                             | 0.0019     | 1076                                      | 80         | 870                                      | 23         | 794                                      | 11         |
| 20       | 50          | 40         | 1.25 | 0.0690                                | 0.0049     | 1.1748                             | 0.0721     | 0.1187                             | 0.0027     | 900                                       | 148        | 789                                      | 34         | 723                                      | 15         |
| 21       | 45          | 36         | 1.23 | 0.0689                                | 0.0048     | 1.1260                             | 0.0732     | 0.1210                             | 0.0025     | 896                                       | 144        | 766                                      | 35         | 736                                      | 15         |
| 22       | 377         | 174        | 2.17 | 0.0682                                | 0.0030     | 1.1143                             | 0.0445     | 0.1199                             | 0.0018     | 876                                       | 88         | 760                                      | 21         | 730                                      | 10         |
| 23       | 192         | 132        | 1.45 | 0.0743                                | 0.0028     | 1.2675                             | 0.0444     | 0.1241                             | 0.0020     | 1050                                      | 76         | 831                                      | 20         | 754                                      | 11         |
| 24       | 771         | 368        | 2.10 | 0.0692                                | 0.0022     | 1.2290                             | 0.0373     | 0.1293                             | 0.0019     | 906                                       | 66         | 814                                      | 17         | 784                                      | 11         |
| 25       | 114         | 81         | 1.41 | 0.0746                                | 0.0039     | 1.2195                             | 0.0587     | 0.1204                             | 0.0020     | 1057                                      | 106        | 810                                      | 27         | 733                                      | 12         |
| 26       | 65          | 46         | 1.41 | 0.0659                                | 0.0042     | 1.1944                             | 0.0574     | 0.1305                             | 0.0025     | 1200                                      | 133        | 798                                      | 27         | 791                                      | 14         |
| 27       | 31          | 18         | 1.75 | 0.1557                                | 0.0124     | 2.5204                             | 0.1934     | 0.1259                             | 0.0041     | 2410                                      | 103        | 1278                                     | 56         | 764                                      | 23         |
| 28       | 109         | 60         | 1.82 | 0.0657                                | 0.0037     | 1.1592                             | 0.0586     | 0.1309                             | 0.0027     | 798                                       | 119        | 782                                      | 28         | 793                                      | 15         |
| 29       | 1347        | 463        | 2.91 | 0.0677                                | 0.0021     | 1.1293                             | 0.0314     | 0.1203                             | 0.0014     | 859                                       | 64         | 767                                      | 15         | 732                                      | 8          |
| 30       | 58          | 41         | 1.43 | 0.0658                                | 0.0047     | 1.1088                             | 0.0683     | 0.1201                             | 0.0032     | 800                                       | 150        | 758                                      | 33         | 731                                      | 19         |
| 31       | 606         | 227        | 2.67 | 0.0752                                | 0.0023     | 1.4240                             | 0.0383     | 0.1374                             | 0.0017     | 1072                                      | 60         | 899                                      | 16         | 830                                      | 10         |
| 32       | 278         | 219        | 1.27 | 0.0723                                | 0.0027     | 1.1889                             | 0.0341     | 0.1198                             | 0.0018     | 994                                       | 108        | 795                                      | 16         | 730                                      | 10         |
| 33       | 666         | 361        | 1.85 | 0.3471                                | 0.0131     | 5.7305                             | 0.1991     | 0.1202                             | 0.0023     | 3694                                      | 58         | 1936                                     | 30         | 732                                      | 13         |

Feidong

| Spot No. | Th<br>(ppm) | U<br>(ppm) | Th/U | $^{207}\text{Pb}^*/^{206}\text{Pb}^*$ | 1 $\sigma$ | $^{207}\text{Pb}^*/^{235}\text{U}$ | 1 $\sigma$ | $^{206}\text{Pb}^*/^{238}\text{U}$ | 1 $\sigma$ | $^{207}\text{Pb}/^{206}\text{Pb}$<br>(Ma) | 1 $\sigma$ | $^{207}\text{Pb}/^{235}\text{U}$<br>(Ma) | 1 $\sigma$ | $^{206}\text{Pb}/^{238}\text{U}$<br>(Ma) | 1 $\sigma$ |
|----------|-------------|------------|------|---------------------------------------|------------|------------------------------------|------------|------------------------------------|------------|-------------------------------------------|------------|------------------------------------------|------------|------------------------------------------|------------|
| XL17     |             |            |      |                                       |            |                                    |            |                                    |            |                                           |            |                                          |            |                                          |            |
| 1        | 48          | 44         | 1.10 | 0.1803                                | 0.0255     | 1.6184                             | 0.1509     | 0.0811                             | 0.0045     | 2655                                      | 237        | 977                                      | 59         | 503                                      | 27         |
| 2        | 854         | 562        | 1.52 | 0.0738                                | 0.0031     | 1.3192                             | 0.0567     | 0.1320                             | 0.0032     | 1035                                      | 85         | 854                                      | 25         | 799                                      | 18         |
| 3        | 20          | 32         | 0.64 | 0.0772                                | 0.0103     | 1.2056                             | 0.1313     | 0.1281                             | 0.0052     | 1128                                      | 268        | 803                                      | 60         | 777                                      | 30         |
| 4        | 26          | 45         | 0.57 | 0.8840                                | 0.0930     | 40.1362                            | 3.6817     | 0.4042                             | 0.0332     | -                                         | -          | 3774                                     | 91         | 2188                                     | 152        |
| 5        | 101         | 124        | 0.81 | 0.0668                                | 0.0048     | 1.0890                             | 0.0728     | 0.1241                             | 0.0028     | 831                                       | 150        | 748                                      | 35         | 754                                      | 16         |
| 6        | 24          | 34         | 0.70 | 0.0817                                | 0.0118     | 1.3017                             | 0.1502     | 0.1311                             | 0.0051     | 1239                                      | 285        | 846                                      | 66         | 794                                      | 29         |
| 7        | 179         | 131        | 1.36 | 0.0639                                | 0.0035     | 1.1493                             | 0.0548     | 0.1269                             | 0.0025     | 739                                       | 117        | 777                                      | 26         | 770                                      | 15         |
| 8        | 42          | 50         | 0.85 | 0.1013                                | 0.0116     | 1.6700                             | 0.1538     | 0.1254                             | 0.0050     | 1650                                      | 213        | 997                                      | 58         | 762                                      | 29         |
| 9        | 186         | 159        | 1.17 | 0.1011                                | 0.0063     | 1.9243                             | 0.1489     | 0.1349                             | 0.0037     | 1644                                      | 115        | 1090                                     | 52         | 815                                      | 21         |
| 10       | 40          | 68         | 0.59 | 0.1114                                | 0.0118     | 1.7152                             | 0.1153     | 0.1182                             | 0.0034     | 1833                                      | 193        | 1014                                     | 43         | 720                                      | 20         |
| 11       | 608         | 288        | 2.11 | 0.0732                                | 0.0036     | 1.3135                             | 0.0622     | 0.1274                             | 0.0021     | 1020                                      | 98         | 852                                      | 27         | 773                                      | 12         |
| 12       | 39          | 45         | 0.87 | 0.4122                                | 0.0677     | 21.9994                            | 3.0713     | 0.4542                             | 0.0511     | 3954                                      | 249        | 3184                                     | 136        | 2414                                     | 226        |
| 13       | 79          | 95         | 0.83 | 0.2209                                | 0.0147     | 4.3741                             | 0.2600     | 0.1474                             | 0.0041     | 2987                                      | 107        | 1707                                     | 49         | 887                                      | 23         |
| 14       | 154         | 95         | 1.63 | 0.0606                                | 0.0060     | 1.0569                             | 0.0963     | 0.1194                             | 0.0032     | 633                                       | 218        | 732                                      | 48         | 727                                      | 19         |
| 15       | 27          | 35         | 0.79 | 0.2571                                | 0.0210     | 5.7060                             | 0.4136     | 0.1678                             | 0.0069     | 3229                                      | 130        | 1932                                     | 63         | 1000                                     | 38         |
| 16       | 53          | 78         | 0.69 | 0.0683                                | 0.0060     | 1.1926                             | 0.0882     | 0.1317                             | 0.0036     | 880                                       | 184        | 797                                      | 41         | 798                                      | 21         |
| 17       | 94          | 95         | 0.99 | 0.1067                                | 0.0079     | 1.7786                             | 0.1296     | 0.1225                             | 0.0036     | 1744                                      | 64         | 1038                                     | 47         | 745                                      | 21         |
| 18       | 45          | 45         | 1.01 | 0.1269                                | 0.0095     | 2.2408                             | 0.1573     | 0.1308                             | 0.0033     | 2055                                      | 132        | 1194                                     | 49         | 792                                      | 19         |
| 19       | 186         | 204        | 0.91 | 0.0669                                | 0.0045     | 1.1983                             | 0.0768     | 0.1228                             | 0.0026     | 835                                       | 134        | 800                                      | 35         | 746                                      | 15         |
| 20       | 37          | 48         | 0.77 | 0.0773                                | 0.0083     | 1.2223                             | 0.1129     | 0.1215                             | 0.0053     | 1128                                      | 215        | 811                                      | 52         | 739                                      | 31         |
| 21       | 888         | 989        | 0.90 | 0.0546                                | 0.0029     | 0.3086                             | 0.0149     | 0.0404                             | 0.0007     | 398                                       | 117        | 273                                      | 12         | 255                                      | 4          |
| 22       | 111         | 126        | 0.88 | 0.0653                                | 0.0045     | 1.1043                             | 0.0739     | 0.1255                             | 0.0035     | 783                                       | 148        | 755                                      | 36         | 762                                      | 20         |
| 23       | 343         | 216        | 1.59 | 0.0594                                | 0.0030     | 1.1266                             | 0.0550     | 0.1348                             | 0.0025     | 589                                       | 105        | 766                                      | 26         | 815                                      | 14         |
| 24       | 25          | 49         | 0.51 | 0.0747                                | 0.0063     | 1.3239                             | 0.1002     | 0.1344                             | 0.0039     | 1061                                      | 169        | 856                                      | 44         | 813                                      | 22         |
| 25       | 122         | 121        | 1.01 | 0.0691                                | 0.0042     | 1.2390                             | 0.0704     | 0.1301                             | 0.0027     | 902                                       | 131        | 818                                      | 32         | 788                                      | 15         |
| 26       | 174         | 299        | 0.58 | 0.0806                                | 0.0045     | 1.1035                             | 0.0612     | 0.1023                             | 0.0035     | 1213                                      | 109        | 755                                      | 30         | 628                                      | 21         |
| 27       | 1341        | 1268       | 1.06 | 0.0564                                | 0.0028     | 0.3112                             | 0.0146     | 0.0401                             | 0.0006     | 478                                       | 111        | 275                                      | 11         | 254                                      | 4          |
| 28       | 234         | 215        | 1.09 | 0.1606                                | 0.0091     | 2.6854                             | 0.1619     | 0.1206                             | 0.0024     | 2462                                      | 96         | 1324                                     | 45         | 734                                      | 14         |
| Lujiang  |             |            |      |                                       |            |                                    |            |                                    |            |                                           |            |                                          |            |                                          |            |
| XL18     |             |            |      |                                       |            |                                    |            |                                    |            |                                           |            |                                          |            |                                          |            |
| 1        | 71          | 74         | 0.96 | 0.0698                                | 0.0042     | 1.3071                             | 0.0840     | 0.1368                             | 0.0033     | 922                                       | 126        | 849                                      | 37         | 827                                      | 19         |
| 2        | 177         | 132        | 1.34 | 0.0665                                | 0.0026     | 1.1128                             | 0.0414     | 0.1208                             | 0.0015     | 820                                       | 79         | 760                                      | 20         | 735                                      | 9          |

| Spot No. | Th<br>(ppm) | U<br>(ppm) | Th/U | $^{207}\text{Pb}^*/^{206}\text{Pb}^*$ | 1 $\sigma$ | $^{207}\text{Pb}^*/^{235}\text{U}$ | 1 $\sigma$ | $^{206}\text{Pb}^*/^{238}\text{U}$ | 1 $\sigma$ | $^{207}\text{Pb}/^{206}\text{Pb}$<br>(Ma) | 1 $\sigma$ | $^{207}\text{Pb}/^{235}\text{U}$<br>(Ma) | 1 $\sigma$ | $^{206}\text{Pb}/^{238}\text{U}$<br>(Ma) | 1 $\sigma$ |
|----------|-------------|------------|------|---------------------------------------|------------|------------------------------------|------------|------------------------------------|------------|-------------------------------------------|------------|------------------------------------------|------------|------------------------------------------|------------|
| 3        | 53          | 48         | 1.10 | 0.0740                                | 0.0066     | 1.1798                             | 0.1031     | 0.1187                             | 0.0031     | 1043                                      | 180        | 791                                      | 48         | 723                                      | 18         |
| 4        | 59          | 68         | 0.87 | 0.0660                                | 0.0034     | 1.1574                             | 0.0571     | 0.1271                             | 0.0022     | 809                                       | 114        | 781                                      | 27         | 771                                      | 12         |
| 5        | 100         | 109        | 0.92 | 0.0849                                | 0.0053     | 1.3704                             | 0.0752     | 0.1172                             | 0.0021     | 1314                                      | 122        | 876                                      | 32         | 715                                      | 12         |
| 6        | 699         | 452        | 1.55 | 0.0637                                | 0.0021     | 1.0428                             | 0.0329     | 0.1178                             | 0.0015     | 731                                       | 269        | 725                                      | 16         | 718                                      | 9          |
| 7        | 71          | 67         | 1.06 | 0.0729                                | 0.0036     | 1.2099                             | 0.0571     | 0.1210                             | 0.0022     | 1013                                      | 100        | 805                                      | 26         | 736                                      | 12         |
| 8        | 196         | 88         | 2.23 | 0.0767                                | 0.0045     | 1.3368                             | 0.0750     | 0.1263                             | 0.0025     | 1122                                      | 119        | 862                                      | 33         | 766                                      | 14         |
| 9        | 382         | 267        | 1.43 | 0.0679                                | 0.0023     | 1.1512                             | 0.0393     | 0.1236                             | 0.0017     | 865                                       | 105        | 778                                      | 19         | 751                                      | 10         |
| 10       | 144         | 133        | 1.08 | 0.0712                                | 0.0035     | 1.2821                             | 0.0648     | 0.1303                             | 0.0025     | 965                                       | 101        | 838                                      | 29         | 789                                      | 14         |
| 11       | 119         | 97         | 1.22 | 0.0680                                | 0.0031     | 1.2070                             | 0.0562     | 0.1297                             | 0.0024     | 878                                       | 97         | 804                                      | 26         | 786                                      | 13         |
| 12       | 62          | 53         | 1.17 | 0.0671                                | 0.0035     | 1.1045                             | 0.0560     | 0.1204                             | 0.0022     | 839                                       | 109        | 756                                      | 27         | 733                                      | 13         |
| 13       | 185         | 149        | 1.25 | 0.0669                                | 0.0025     | 1.1607                             | 0.0409     | 0.1265                             | 0.0018     | 835                                       | 78         | 782                                      | 19         | 768                                      | 10         |
| 14       | 93          | 93         | 1.01 | 0.0729                                | 0.0049     | 1.2005                             | 0.0640     | 0.1207                             | 0.0021     | 1011                                      | 131        | 801                                      | 30         | 735                                      | 12         |
| 15       | 56          | 72         | 0.77 | 0.0658                                | 0.0032     | 1.1739                             | 0.0543     | 0.1308                             | 0.0022     | 800                                       | 102        | 788                                      | 25         | 793                                      | 13         |
| 16       | 116         | 148        | 0.79 | 0.0642                                | 0.0028     | 1.1804                             | 0.0468     | 0.1337                             | 0.0019     | 750                                       | 93         | 791                                      | 22         | 809                                      | 11         |
| 17       | 68          | 76         | 0.90 | 0.0697                                | 0.0035     | 1.1904                             | 0.0522     | 0.1204                             | 0.0021     | 920                                       | 103        | 796                                      | 24         | 733                                      | 12         |
| 18       | 61          | 55         | 1.11 | 0.0645                                | 0.0045     | 1.1191                             | 0.0756     | 0.1282                             | 0.0028     | 759                                       | 147        | 763                                      | 36         | 778                                      | 16         |
| 19       | 115         | 100        | 1.14 | 0.0631                                | 0.0027     | 1.1338                             | 0.0455     | 0.1312                             | 0.0020     | 722                                       | 90         | 770                                      | 22         | 795                                      | 12         |
| 20       | 56          | 47         | 1.21 | 0.0672                                | 0.0040     | 1.2219                             | 0.0702     | 0.1341                             | 0.0028     | 843                                       | 122        | 811                                      | 32         | 811                                      | 16         |
| 21       | 51          | 63         | 0.81 | 0.0669                                | 0.0033     | 1.1214                             | 0.0497     | 0.1215                             | 0.0023     | 835                                       | 136        | 764                                      | 24         | 739                                      | 13         |
| 22       | 283         | 113        | 2.50 | 0.0725                                | 0.0030     | 1.0554                             | 0.0433     | 0.1058                             | 0.0017     | 1000                                      | 83         | 732                                      | 21         | 648                                      | 10         |
| 23       | 81          | 31         | 2.58 | 0.0766                                | 0.0047     | 1.3431                             | 0.0733     | 0.1310                             | 0.0026     | 1109                                      | 122        | 865                                      | 32         | 793                                      | 15         |
| 24       | 78          | 40         | 1.94 | 0.0675                                | 0.0039     | 1.0997                             | 0.0589     | 0.1183                             | 0.0025     | 854                                       | 119        | 753                                      | 28         | 721                                      | 15         |
| 25       | 149         | 107        | 1.39 | 0.0897                                | 0.0040     | 1.5096                             | 0.0670     | 0.1217                             | 0.0022     | 1420                                      | 85         | 934                                      | 27         | 740                                      | 12         |
| 26       | 111         | 79         | 1.40 | 0.0639                                | 0.0033     | 1.1264                             | 0.0547     | 0.1288                             | 0.0023     | 739                                       | 114        | 766                                      | 26         | 781                                      | 13         |
| 27       | 59          | 71         | 0.83 | 0.0661                                | 0.0030     | 1.1974                             | 0.0487     | 0.1298                             | 0.0021     | 809                                       | 96         | 799                                      | 23         | 787                                      | 12         |
| 28       | 69          | 37         | 1.86 | 0.0818                                | 0.0059     | 1.4756                             | 0.0989     | 0.1336                             | 0.0030     | 1243                                      | 141        | 920                                      | 41         | 809                                      | 17         |
| 29       | 71          | 61         | 1.17 | 0.0684                                | 0.0039     | 1.1774                             | 0.0667     | 0.1240                             | 0.0023     | 881                                       | 115        | 790                                      | 31         | 754                                      | 13         |
| 30       | 102         | 107        | 0.95 | 0.0645                                | 0.0028     | 1.1311                             | 0.0460     | 0.1290                             | 0.0019     | 767                                       | 97         | 768                                      | 22         | 782                                      | 11         |
| 31       | 53          | 49         | 1.08 | 0.0678                                | 0.0039     | 1.1772                             | 0.0621     | 0.1300                             | 0.0024     | 861                                       | 119        | 790                                      | 29         | 788                                      | 14         |
| 32       | 283         | 108        | 2.62 | 0.0643                                | 0.0032     | 1.0084                             | 0.0478     | 0.1159                             | 0.0018     | 752                                       | 106        | 708                                      | 24         | 707                                      | 10         |
| Susong   |             |            |      |                                       |            |                                    |            |                                    |            |                                           |            |                                          |            |                                          |            |
| XL23     |             |            |      |                                       |            |                                    |            |                                    |            |                                           |            |                                          |            |                                          |            |
| 1        | 39          | 27         | 1.45 | 0.0658                                | 0.0044     | 1.1261                             | 0.0708     | 0.1288                             | 0.0025     | 1200                                      | 173        | 766                                      | 34         | 781                                      | 14         |

| Spot No.  | Th<br>(ppm) | U<br>(ppm) | Th/U | $^{207}\text{Pb}^*/^{206}\text{Pb}^*$ | 1 $\sigma$ | $^{207}\text{Pb}^*/^{235}\text{U}$ | 1 $\sigma$ | $^{206}\text{Pb}^*/^{238}\text{U}$ | 1 $\sigma$ | $^{207}\text{Pb}/^{206}\text{Pb}$<br>(Ma) | 1 $\sigma$ | $^{207}\text{Pb}/^{235}\text{U}$<br>(Ma) | 1 $\sigma$ | $^{206}\text{Pb}/^{238}\text{U}$<br>(Ma) | 1 $\sigma$ |
|-----------|-------------|------------|------|---------------------------------------|------------|------------------------------------|------------|------------------------------------|------------|-------------------------------------------|------------|------------------------------------------|------------|------------------------------------------|------------|
| 2         | 43          | 41         | 1.06 | 0.0756                                | 0.0044     | 1.2813                             | 0.0639     | 0.1262                             | 0.0028     | 1083                                      | 119        | 837                                      | 28         | 766                                      | 16         |
| 3         | 32          | 34         | 0.96 | 0.0719                                | 0.0049     | 1.1793                             | 0.0747     | 0.1219                             | 0.0025     | 983                                       | 141        | 791                                      | 35         | 741                                      | 15         |
| 4         | 185         | 84         | 2.21 | 0.0690                                | 0.0039     | 1.0710                             | 0.0631     | 0.1118                             | 0.0027     | 898                                       | 119        | 739                                      | 31         | 683                                      | 15         |
| 5         | 82          | 70         | 1.17 | 0.0672                                | 0.0030     | 1.1149                             | 0.0471     | 0.1204                             | 0.0019     | 856                                       | 125        | 761                                      | 23         | 733                                      | 11         |
| 6         | 69          | 54         | 1.28 | 0.0696                                | 0.0040     | 1.0947                             | 0.0602     | 0.1144                             | 0.0022     | 917                                       | 119        | 751                                      | 29         | 698                                      | 13         |
| 7         | 58          | 48         | 1.22 | 0.0717                                | 0.0039     | 1.2079                             | 0.0637     | 0.1230                             | 0.0023     | 977                                       | 113        | 804                                      | 29         | 748                                      | 13         |
| 8         | 42          | 40         | 1.04 | 0.0724                                | 0.0047     | 1.1323                             | 0.0695     | 0.1155                             | 0.0023     | 996                                       | 133        | 769                                      | 33         | 704                                      | 14         |
| 9         | 36          | 34         | 1.05 | 0.1262                                | 0.0064     | 2.2980                             | 0.1038     | 0.1357                             | 0.0031     | 2056                                      | 89         | 1212                                     | 32         | 820                                      | 18         |
| 10        | 84          | 69         | 1.23 | 0.1408                                | 0.0065     | 2.5776                             | 0.0951     | 0.1344                             | 0.0028     | 2239                                      | 81         | 1294                                     | 27         | 813                                      | 16         |
| 11        | 54          | 40         | 1.34 | 0.0853                                | 0.0065     | 1.5228                             | 0.1070     | 0.1310                             | 0.0031     | 1324                                      | 147        | 940                                      | 43         | 793                                      | 17         |
| 12        | 26          | 31         | 0.84 | 0.0672                                | 0.0049     | 1.1302                             | 0.0751     | 0.1270                             | 0.0028     | 843                                       | 153        | 768                                      | 36         | 771                                      | 16         |
| 13        | 34          | 32         | 1.07 | 0.0703                                | 0.0059     | 1.0975                             | 0.0771     | 0.1203                             | 0.0033     | 939                                       | 173        | 752                                      | 37         | 732                                      | 19         |
| 14        | 130         | 69         | 1.89 | 0.0707                                | 0.0045     | 1.1697                             | 0.0627     | 0.1182                             | 0.0023     | 950                                       | 131        | 787                                      | 29         | 720                                      | 13         |
| 15        | 40          | 38         | 1.03 | 0.0673                                | 0.0041     | 1.1030                             | 0.0616     | 0.1222                             | 0.0025     | 850                                       | 127        | 755                                      | 30         | 743                                      | 14         |
| 16        | 450         | 199        | 2.27 | 0.0650                                | 0.0027     | 1.1923                             | 0.0456     | 0.1326                             | 0.0018     | 776                                       | 85         | 797                                      | 21         | 803                                      | 10         |
| 17        | 24          | 17         | 1.40 | 0.0806                                | 0.0095     | 1.3452                             | 0.1316     | 0.1344                             | 0.0057     | 1213                                      | 234        | 865                                      | 57         | 813                                      | 33         |
| 18        | 48          | 34         | 1.41 | 0.0718                                | 0.0049     | 1.2463                             | 0.0784     | 0.1280                             | 0.0025     | 989                                       | 144        | 822                                      | 35         | 776                                      | 14         |
| 19        | 26          | 29         | 0.87 | 0.0686                                | 0.0047     | 1.1778                             | 0.0720     | 0.1295                             | 0.0030     | 887                                       | 148        | 790                                      | 34         | 785                                      | 17         |
| 20        | 2468        | 1720       | 1.43 | 0.1146                                | 0.0032     | 1.0002                             | 0.0255     | 0.0628                             | 0.0007     | 1874                                      | 45         | 704                                      | 13         | 392                                      | 4          |
| 21        | 251         | 145        | 1.73 | 0.2246                                | 0.0157     | 5.1624                             | 0.4457     | 0.1474                             | 0.0041     | 3014                                      | 112        | 1846                                     | 73         | 886                                      | 23         |
| 22        | 152         | 71         | 2.15 | 0.0666                                | 0.0034     | 1.1386                             | 0.0533     | 0.1212                             | 0.0020     | 833                                       | 106        | 772                                      | 25         | 738                                      | 12         |
| 23        | 175         | 97         | 1.82 | 0.0734                                | 0.0050     | 1.2280                             | 0.0732     | 0.1219                             | 0.0025     | 1026                                      | 143        | 813                                      | 33         | 741                                      | 15         |
| 24        | 74          | 47         | 1.58 | 0.0709                                | 0.0049     | 1.2440                             | 0.0715     | 0.1222                             | 0.0033     | 954                                       | 147        | 821                                      | 32         | 743                                      | 19         |
| 25        | 79          | 91         | 0.87 | 0.0672                                | 0.0034     | 1.1036                             | 0.0551     | 0.1191                             | 0.0022     | 856                                       | 105        | 755                                      | 27         | 726                                      | 13         |
| 26        | 41          | 35         | 1.15 | 0.1139                                | 0.0052     | 2.0925                             | 0.0894     | 0.1343                             | 0.0024     | 1863                                      | 83         | 1146                                     | 29         | 813                                      | 14         |
| 27        | 137         | 190        | 0.72 | 0.0691                                | 0.0028     | 1.2912                             | 0.0534     | 0.1346                             | 0.0019     | 902                                       | 83         | 842                                      | 24         | 814                                      | 11         |
| 28        | 958         | 360        | 2.66 | 0.0664                                | 0.0023     | 1.0578                             | 0.0351     | 0.1151                             | 0.0014     | 820                                       | 70         | 733                                      | 17         | 702                                      | 8          |
| 29        | 133         | 107        | 1.24 | 0.0651                                | 0.0031     | 1.0939                             | 0.0473     | 0.1212                             | 0.0019     | 777                                       | 101        | 750                                      | 23         | 737                                      | 11         |
| 30        | 39          | 32         | 1.20 | 0.0679                                | 0.0054     | 1.0823                             | 0.0777     | 0.1206                             | 0.0029     | 865                                       | 167        | 745                                      | 38         | 734                                      | 17         |
| 31        | 140         | 73         | 1.91 | 0.0756                                | 0.0058     | 1.2494                             | 0.0899     | 0.1218                             | 0.0033     | 1083                                      | 153        | 823                                      | 41         | 741                                      | 19         |
| 32        | 91          | 58         | 1.56 | 0.0740                                | 0.0069     | 1.1985                             | 0.1031     | 0.1207                             | 0.0031     | 1043                                      | 191        | 800                                      | 48         | 735                                      | 18         |
| XL24<br>1 | 90          | 93         | 0.96 | 0.0615                                | 0.0036     | 1.1114                             | 0.0687     | 0.1313                             | 0.0026     | 657                                       | 132        | 759                                      | 33         | 796                                      | 15         |

| Spot No. | Th<br>(ppm) | U<br>(ppm) | Th/U | <sup>207</sup> Pb*/ <sup>206</sup> Pb* | 1σ     | <sup>207</sup> Pb*/ <sup>235</sup> U | 1σ     | <sup>206</sup> Pb*/ <sup>238</sup> U | 1σ     | <sup>207</sup> Pb/ <sup>206</sup> Pb<br>(Ma) | 1σ  | <sup>207</sup> Pb/ <sup>235</sup> U<br>(Ma) | 1σ | <sup>206</sup> Pb/ <sup>238</sup> U<br>(Ma) | 1σ |
|----------|-------------|------------|------|----------------------------------------|--------|--------------------------------------|--------|--------------------------------------|--------|----------------------------------------------|-----|---------------------------------------------|----|---------------------------------------------|----|
| 2        | 265         | 114        | 2.33 | 0.0894                                 | 0.0059 | 1.6324                               | 0.1096 | 0.1337                               | 0.0037 | 1413                                         | 132 | 983                                         | 42 | 809                                         | 21 |
| 3        | 153         | 157        | 0.98 | 0.1063                                 | 0.0065 | 1.9519                               | 0.1297 | 0.1307                               | 0.0024 | 1736                                         | 112 | 1099                                        | 45 | 792                                         | 14 |
| 4        | 237         | 158        | 1.50 | 0.0727                                 | 0.0033 | 1.2375                               | 0.0524 | 0.1234                               | 0.0021 | 1006                                         | 86  | 818                                         | 24 | 750                                         | 12 |
| 5        | 159         | 131        | 1.22 | 0.0725                                 | 0.0040 | 1.3582                               | 0.0730 | 0.1341                               | 0.0024 | 998                                          | 111 | 871                                         | 31 | 811                                         | 14 |
| 6        | 760         | 321        | 2.37 | 0.2569                                 | 0.0249 | 8.5799                               | 1.2405 | 0.1758                               | 0.0103 | 3228                                         | 154 | 2294                                        | 13 | 1044                                        | 56 |
| 7        | 2520        | 413        | 6.11 | 0.0822                                 | 0.0041 | 0.6278                               | 0.0290 | 0.0547                               | 0.0010 | 1252                                         | 98  | 495                                         | 18 | 343                                         | 6  |
| 8        | 278         | 204        | 1.36 | 0.0872                                 | 0.0040 | 1.5871                               | 0.0698 | 0.1306                               | 0.0022 | 1365                                         | 89  | 965                                         | 27 | 791                                         | 12 |
| 9        | 545         | 320        | 1.70 | 0.0664                                 | 0.0028 | 1.1332                               | 0.0463 | 0.1220                               | 0.0015 | 817                                          | 88  | 769                                         | 22 | 742                                         | 9  |
| 10       | 135         | 110        | 1.23 | 0.0669                                 | 0.0029 | 1.1784                               | 0.0485 | 0.1271                               | 0.0020 | 835                                          | 91  | 791                                         | 23 | 771                                         | 11 |
| 11       | 78          | 79         | 0.99 | 0.0702                                 | 0.0039 | 1.2826                               | 0.0673 | 0.1338                               | 0.0027 | 1000                                         | 119 | 838                                         | 30 | 810                                         | 15 |
| 12       | 24          | 45         | 0.53 | 0.0765                                 | 0.0067 | 1.2981                               | 0.0948 | 0.1287                               | 0.0037 | 1109                                         | 176 | 845                                         | 42 | 781                                         | 21 |
| 13       | 135         | 81         | 1.66 | 0.0714                                 | 0.0062 | 1.1987                               | 0.1020 | 0.1204                               | 0.0032 | 969                                          | 178 | 800                                         | 47 | 733                                         | 18 |
| 14       | 49          | 54         | 0.90 | 0.0725                                 | 0.0052 | 1.3008                               | 0.0808 | 0.1293                               | 0.0027 | 998                                          | 142 | 846                                         | 36 | 784                                         | 16 |
| 15       | 60          | 51         | 1.18 | 0.0795                                 | 0.0047 | 1.5014                               | 0.0815 | 0.1404                               | 0.0031 | 1183                                         | 119 | 931                                         | 33 | 847                                         | 18 |
| 16       | 85          | 122        | 0.70 | 0.0733                                 | 0.0041 | 1.2632                               | 0.0689 | 0.1241                               | 0.0026 | 1022                                         | 113 | 829                                         | 31 | 754                                         | 15 |
| 17       | 52          | 45         | 1.17 | 0.0728                                 | 0.0054 | 1.3937                               | 0.0952 | 0.1387                               | 0.0034 | 1009                                         | 151 | 886                                         | 40 | 838                                         | 19 |
| 18       | 394         | 231        | 1.71 | 0.0893                                 | 0.0034 | 1.5150                               | 0.0559 | 0.1220                               | 0.0016 | 1411                                         | 74  | 936                                         | 23 | 742                                         | 9  |
| 19       | 258         | 153        | 1.68 | 0.0702                                 | 0.0031 | 1.1703                               | 0.0492 | 0.1210                               | 0.0017 | 1000                                         | 95  | 787                                         | 23 | 736                                         | 10 |
| 20       | 94          | 84         | 1.11 | 0.0669                                 | 0.0039 | 1.1185                               | 0.0643 | 0.1225                               | 0.0025 | 833                                          | 123 | 762                                         | 31 | 745                                         | 15 |
| 21       | 211         | 109        | 1.93 | 0.0704                                 | 0.0036 | 1.1334                               | 0.0555 | 0.1178                               | 0.0019 | 939                                          | 106 | 769                                         | 26 | 718                                         | 11 |
| 22       | 106         | 107        | 0.99 | 0.0772                                 | 0.0041 | 1.4012                               | 0.0725 | 0.1330                               | 0.0027 | 1128                                         | 105 | 889                                         | 31 | 805                                         | 15 |
| 23       | 198         | 162        | 1.22 | 0.0641                                 | 0.0029 | 1.1469                               | 0.0458 | 0.1303                               | 0.0020 | 746                                          | 94  | 776                                         | 22 | 789                                         | 11 |
| 24       | 195         | 145        | 1.35 | 0.0598                                 | 0.0027 | 1.0053                               | 0.0422 | 0.1212                               | 0.0018 | 598                                          | 103 | 707                                         | 21 | 738                                         | 11 |
| 25       | 1189        | 501        | 2.37 | 0.0608                                 | 0.0022 | 0.9691                               | 0.0325 | 0.1141                               | 0.0016 | 632                                          | 76  | 688                                         | 17 | 697                                         | 9  |
| 26       | 28          | 32         | 0.86 | 0.0762                                 | 0.0066 | 1.3956                               | 0.1124 | 0.1314                               | 0.0035 | 1099                                         | 174 | 887                                         | 48 | 796                                         | 20 |
| 27       | 265         | 167        | 1.59 | 0.0618                                 | 0.0027 | 1.1379                               | 0.0466 | 0.1334                               | 0.0018 | 665                                          | 99  | 772                                         | 22 | 807                                         | 10 |
| 28       | 143         | 95         | 1.51 | 0.0639                                 | 0.0038 | 1.1109                               | 0.0580 | 0.1287                               | 0.0023 | 739                                          | 126 | 759                                         | 28 | 781                                         | 13 |
| 29       | 94          | 73         | 1.30 | 0.0633                                 | 0.0038 | 1.0791                               | 0.0637 | 0.1221                               | 0.0024 | 717                                          | 128 | 743                                         | 31 | 742                                         | 14 |
| 30       | 271         | 183        | 1.48 | 0.0674                                 | 0.0031 | 1.2518                               | 0.0615 | 0.1341                               | 0.0018 | 850                                          | 96  | 824                                         | 28 | 811                                         | 10 |
| 31       | 91          | 86         | 1.06 | 0.0769                                 | 0.0044 | 1.4003                               | 0.0765 | 0.1344                               | 0.0031 | 1118                                         | 115 | 889                                         | 32 | 813                                         | 18 |
| 32       | 82          | 76         | 1.08 | 0.0739                                 | 0.0048 | 1.2399                               | 0.0705 | 0.1219                               | 0.0027 | 1039                                         | 130 | 819                                         | 32 | 741                                         | 15 |

\*Pb represents radiogenic Pb.
